# Supplementary material for: Integrative Analysis of the GRAS Genes From Chinese White Pear (Pyrus bretschneideri): A Critical Role in Leaf Regeneration
Source: Front Plant Sci. 2022 Jun 6;13:898786. doi: 10.3389/fpls.2022.898786 (PMC9208361; doi:10.3389/fpls.2022.898786)
Supplement: Supplementary Table S1 — Basic information of GRAS gene in Pyrus bretschneideri. [file Table_1.XLSX]

## Sheet: Sheet1
Table.S1 Basic Information of GRAS Gene in Pyrus bretschneideri.
Gene name	Gene ID	AA Length	Molecular weight/kD	pI	Subcellular localization
PbrGARS71	Pbr024319.1	507	56827.6	5.33	Nuclear
PbrGRAS1	Pbr018647.1	642	70295.9	6.46	Nuclear
PbrGRAS10	Pbr024234.1	582	64617.4	5.79	Chloroplast
PbrGRAS11	Pbr027642.1	474	52883	6.05	Nuclear
PbrGRAS12	Pbr023110.1	457	51921.6	6.01	cytosol
PbrGRAS13	Pbr003875.1	738	82811.9	5.39	Nuclear
PbrGRAS14	Pbr003874.1	464	5398.6	8.71	cytosol
PbrGRAS15	Pbr003873.1	809	90807.9	5.27	Nuclear
PbrGRAS16	Pbr003871.1	683	77183.8	5.87	Nuclear
PbrGRAS17	Pbr003870.1	677	76868.6	5.7	Nuclear
PbrGRAS18	Pbr003869.1	538	6207.27	8.76	Nuclear
PbrGRAS19	Pbr003868.1	673	76703.7	6.16	Nuclear
PbrGRAS2	Pbr017150.1	748	81597.5	5.73	Nuclear
PbrGRAS20	Pbr003867.1	679	77380.6	5.37	Nuclear
PbrGRAS21	Pbr019422.1	511	58232.6	4.77	Nuclear
PbrGRAS22	Pbr019423.1	536	60822.6	4.72	Nuclear
PbrGRAS23	Pbr009003.1	794	86911.7	6.17	Nuclear
PbrGRAS24	Pbr032804.1	458	51370.3	5.22	cytosol
PbrGRAS25	Pbr010041.1	577	64162.9	4.99	Nuclear
PbrGRAS26	Pbr027347.1	583	64973.2	6.18	Nuclear
PbrGRAS27	Pbr026688.1	501	56396	5.82	Endoplasmic reticulum
PbrGRAS28	Pbr000044.1	536	60188.2	5.86	Nuclear
PbrGRAS29	Pbr027204.1	529	58984.4	6.05	Nuclear
PbrGRAS3	Pbr022956.1	457	51609.4	5.81	cytosol
PbrGRAS30	Pbr028415.1	471	52587.5	5.76	Nuclear
PbrGRAS31	Pbr030739.1	678	74660.1	5.69	Chloroplast
PbrGRAS32	Pbr009709.1	458	51795.6	5.95	Nuclear
PbrGRAS33	Pbr018479.1	626	68945.9	5.3	Nuclear
PbrGRAS34	Pbr032385.1	230	25762.4	8.58	Nuclear
PbrGRAS35	Pbr016067.1	105	11494.2	6.4	cytosol
PbrGRAS36	Pbr016671.1	580	62938.8	5.09	Chloroplast
PbrGRAS37	Pbr029703.1	490	54548.7	5.73	Nuclear
PbrGRAS38	Pbr005254.1	55	62368.7	5.86	Nuclear
PbrGRAS39	Pbr018056.1	460	51003.4	6.18	Chloroplast
PbrGRAS4	Pbr001048.1	507	56794.4	5.21	Nuclear
PbrGRAS40	Pbr017879.1	449	48720	5.34	Chloroplast
PbrGRAS41	Pbr041554.1	705	78326.2	5.9	Nuclear
PbrGRAS42	Pbr038494.1	542	60640.6	5.96	Nuclear
PbrGRAS43	Pbr033601.1	231	26031.7	5.19	Chloroplast
PbrGRAS44	Pbr011071.1	508	57069.3	5.68	Endoplasmic reticulum
PbrGRAS45	Pbr039366.2	578	64291	5.08	Nuclear
PbrGRAS46	Pbr018237.1	475	54412.8	6.75	Nuclear
PbrGRAS47	Pbr041202.1	630	71584.3	5.81	Chloroplast
PbrGRAS48	Pbr029392.1	471	52547.6	5.89	Nuclear
PbrGRAS49	Pbr017325.1	461	52481.4	6.21	Nuclear
PbrGRAS5	Pbr005472.1	604	66618.7	5.19	Nuclear
PbrGRAS50	Pbr018916.1	735	82861.1	5.59	Nuclear
PbrGRAS51	Pbr018917.1	811	91022.9	5.37	Nuclear
PbrGRAS52	Pbr018918.1	805	89880.7	5.36	Nuclear
PbrGRAS53	Pbr018920.1	692	78268	6.17	Nuclear
PbrGRAS54	Pbr018921.1	712	80018.1	5.72	Nuclear
PbrGRAS55	Pbr018922.1	661	75076.9	6.59	Nuclear
PbrGRAS56	Pbr018923.1	679	77319.2	6.15	Nuclear
PbrGRAS57	Pbr018924.1	676	76990.5	5.44	Nuclear
PbrGRAS58	Pbr028512.1	785	84521.2	6.11	Chloroplast
PbrGRAS59	Pbr028236.1	534	60412.8	4.68	Nuclear
PbrGRAS6	Pbr014064.1	518	56719.4	5.44	peroxisome
PbrGRAS60	Pbr028237.1	534	60792.7	4.81	Nuclear
PbrGRAS61	Pbr010864.1	653	71128.8	6.49	Chloroplast
PbrGRAS62	Pbr011960.1	441	49001.8	8.38	Chloroplast
PbrGRAS63	Pbr011959.1	600	67491.7	5.12	Nuclear
PbrGRAS64	Pbr034525.1	720	76567.3	5.36	Nuclear
PbrGRAS65	Pbr018291.1	549	58336.1	5.76	Nuclear
PbrGRAS66	Pbr036939.1	532	59264.5	5.97	Nuclear
PbrGRAS67	Pbr016997.1	62	6881.75	4.97	peroxisome
PbrGRAS68	Pbr014306.1	603	66578.6	5.11	Nuclear
PbrGRAS69	Pbr017263.1	513	57088.3	5.29	cytosol
PbrGRAS7	Pbr022696.1	627	70984.6	5.57	cytosol
PbrGRAS70	Pbr023527.1	473	53115.6	5.51	cytosol
PbrGRAS72	Pbr037013.1	513	56240.2	5.29	Chloroplast
PbrGRAS73	Pbr033333.1	443	49051.9	5.47	Chloroplast
PbrGRAS74	Pbr012085.1	634	69689.6	5.27	Nuclear
PbrGRAS75	Pbr013644.1	637	69269.1	5.7	Nuclear
PbrGRAS76	Pbr024549.1	584	63747.6	4.98	Nuclear
PbrGRAS77	Pbr007753.1	443	49166	5.3	Chloroplast
PbrGRAS78	Pbr021861.1	702	78207.2	6.03	Nuclear
PbrGRAS79	Pbr003262.1	475	54168.7	6.39	Nuclear
PbrGRAS8	Pbr040573.1	582	64647.5	5.73	Chloroplast
PbrGRAS80	Pbr004512.1	677	74478	5.24	Nuclear
PbrGRAS81	Pbr004607.1	749	83917.4	6.41	Nuclear
PbrGRAS82	Pbr005109.1	641	70819.8	5.29	Nuclear
PbrGRAS83	Pbr010433.1	462	51259.1	5.44	cytosol
PbrGRAS84	Pbr021507.1	642	70387.1	6.42	Nuclear
PbrGRAS85	Pbr029793.1	533	58796.3	5.24	Nuclear
PbrGRAS86	Pbr029798.1	533	58796.3	5.24	Nuclear
PbrGRAS87	Pbr033535.1	741	83306.5	5.84	Chloroplast
PbrGRAS88	Pbr035217.1	794	86926.7	6.17	Nuclear
PbrGRAS89	Pbr035386.1	799	87503.4	6.4	Nuclear
PbrGRAS9	Pbr041406.1	536	59321.9	5.13	Nuclear
PbrGRAS90	Pbr035399.1	541	60981.4	8.46	Nuclear
PbrGRAS91	Pbr037186.1	700	77937.9	5.98	Nuclear
PbrGRAS92	Pbr037212.1	660	72714.7	5.59	Chloroplast
PbrGRAS93	Pbr037662.1	261	29743.7	4.98	cytosol
PbrGRAS94	Pbr037663.1	255	28108.4	8.29	cytosol
PbrGRAS95	Pbr037666.1	255	28108.4	8.29	cytosol
PbrGRAS96	Pbr038995.1	741	83283.6	5.95	Chloroplast
PbrGRAS97	Pbr041150.1	258	29773.1	7.21	Chloroplast
PbrGRAS98	Pbr041223.1	702	78207.2	6.03	Nuclear
PbrGRAS99	Pbr042464.1	244	27149.2	10.08	cytosol
