# Supplementary material for: Integrative Analysis of the GRAS Genes From Chinese White Pear (Pyrus bretschneideri): A Critical Role in Leaf Regeneration
Source: Front Plant Sci. 2022 Jun 6;13:898786. doi: 10.3389/fpls.2022.898786 (PMC9208361; doi:10.3389/fpls.2022.898786)
Supplement: Supplementary Table S2 — List of GRAS orthologous gene pairs identified in Pyrus bretschenedri. [file Table_2.XLSX]

## Sheet: Sheet1
Table.S2 List of GRAS orthologous gene pairs identified in Pyrus bretschenedri
		Pear vs Stweet Cherry							Pear vs Straw berry							Pear vs Peach							Pear vs Japanese apricot
Location	Gene name		Location	Orthologous pairs				Location	Gene name		Location	Orthologous pairs			Location	Gene name		Location	Orthologous pairs			Location	Gene name		Location	Orthologous pairs
Chr2	Pbr022956.1	==	PAV_r1.0chr2	Pav_sc0003033.1_g190.1.mk				Chr1	Pbr018647.1	==	Fvb7	FvH4_7g30100.1			Chr1	Pbr018647.1	==	scaffold_2	ppa002688m			Chr1	Pbr018647.1	==	Pa5	Pm019863
Chr2	Pbr001048.1	==	PAV_r1.0chr6	Pav_sc0000666.1_g050.1.mk				Chr2	Pbr014064.1	==	Fvb1	FvH4_1g04080.1			Chr2	Pbr022956.1	==	scaffold_2	ppa005439m			Chr2	Pbr001048.1	==	Pa1	Pm002381
Chr2	Pbr005472.1	==	PAV_r1.0chr7	Pav_sc0000099.1_g940.1.mk				Chr2	Pbr001048.1	==	Fvb1	FvH4_1g17690.1			Chr2	Pbr001048.1	==	scaffold_6	ppa004454m			Chr2	Pbr022956.1	==	Pa5	Pm016466
Chr2	Pbr014064.1	==	PAV_r1.0chr7	Pav_sc0000704.1_g100.1.mk				Chr2	Pbr005472.1	==	Fvb1	FvH4_1g13400.1			Chr2	Pbr005472.1	==	scaffold_7	ppa003124m			Chr2	Pbr005472.1	==	Pa8	Pm026616
Chr3	Pbr003875.1	==	PAV_r1.0chr2	Pav_sc0000554.1_g600.1.mk				Chr2	Pbr022956.1	==	Fvb7	FvH4_7g02290.1			Chr2	Pbr014064.1	==	scaffold_7	ppa003975m			Chr2	Pbr014064.1	==	Pa8	Pm027468
Chr3	Pbr041406.1	==	PAV_r1.0chr4	Pav_sc0000622.1_g450.1.mk				Chr3	Pbr003875.1	==	Fvb3	FvH4_3g36540.1			Chr3	Pbr003875.1	==	scaffold_2	ppa021438m			Chr3	Pbr023110.1	==	Pa1	Pm000313
Chr3	Pbr040573.1	==	PAV_r1.0chr4	Pav_sc0000398.1_g400.1.mk				Chr3	Pbr003871.1	==	Fvb3	FvH4_3g36570.1			Chr3	Pbr040573.1	==	scaffold_4	ppa003323m			Chr3	Pbr003873.1	==	Pa1	Pm000713
Chr3	Pbr003875.1	==	PAV_r1.0chr6	Pav_sc0001812.1_g060.1.mk				Chr3	Pbr003869.1	==	Fvb3	FvH4_3g36680.1			Chr3	Pbr027642.1	==	scaffold_4	ppa005243m			Chr3	Pbr003875.1	==	Pa1	Pm002685
Chr3	Pbr003869.1	==	PAV_r1.0chr6	Pav_sc0001812.1_g040.1.mk				Chr3	Pbr041406.1	==	Fvb3	FvH4_3g24030.1			Chr3	Pbr003875.1	==	scaffold_6	ppa001883m			Chr3	Pbr003875.1	==	Pa5	Pm018822
Chr3	Pbr023110.1	==	PAV_r1.0chr6	Pav_sc0000206.1_g120.1.mk				Chr3	Pbr040573.1	==	Fvb3	FvH4_3g21580.1			Chr3	Pbr003875.1	==	scaffold_6	ppa019574m			Chr3	Pbr022696.1	==	Pa6	Pm020070
Chr3	Pbr022696.1	==	PAV_r1.0chr8	Pav_sc0000130.1_g670.1.mk				Chr3	Pbr023110.1	==	Fvb3	FvH4_3g41310.1			Chr3	Pbr003873.1	==	scaffold_6	ppa026849m			Chr4	Pbr019422.1	==	Pa1	Pm002855
Chr4	Pbr019422.1	==	PAV_r1.0chr6	Pav_sc0001341.1_g120.1.mk				Chr3	Pbr022696.1	==	Fvb5	FvH4_5g39080.1			Chr3	Pbr003870.1	==	scaffold_6	ppa002392m			Chr4	Pbr032804.1	==	Pa2	Pm007259
Chr5	Pbr000044.1	==	PAV_r1.0chr3	Pav_sc0000157.1_g110.1.mk				Chr3	Pbr003875.1	==	Fvb6	FvH4_6g13520.1			Chr3	Pbr023110.1	==	scaffold_6	ppa025834m			Chr5	Pbr000044.1	==	Pa3	Pm012494
Chr5	Pbr000044.1	==	PAV_r1.0chr4	Pav_sc0002233.1_g260.1.mk				Chr3	Pbr003875.1	==	Fvb7	FvH4_7g22720.1			Chr3	Pbr022696.1	==	scaffold_8	ppa023374m			Chr5	Pbr000044.1	==	Pa4	Pm015021
Chr5	Pbr027347.1	==	PAV_r1.0chr4	Pav_sc0000398.1_g400.1.mk				Chr4	Pbr019422.1	==	Fvb6	FvH4_6g10940.1			Chr4	Pbr032804.1	==	scaffold_1	ppa1027119m			Chr5	Pbr026688.1	==	Pa6	Pm020564
Chr5	Pbr010041.1	==	PAV_r1.0chr8	Pav_sc0005418.1_g120.1.mk				Chr5	Pbr026688.1	==	Fvb2	FvH4_2g21170.1			Chr4	Pbr019422.1	==	scaffold_6	ppa020043m			Chr5	Pbr010041.1	==	Pa6	Pm022704
Chr5	Pbr026688.1	==	PAV_r1.0chr8	Pav_sc0000583.1_g990.1.mk				Chr5	Pbr010041.1	==	Fvb2	FvH4_2g15030.1			Chr5	Pbr000044.1	==	scaffold_3	ppa003702m			Chr6	Pbr030739.1	==	Pa7	Pm023754
Chr6	Pbr027204.1	==	PAV_r1.0chr5	Pav_sc0000261.1_g150.1.mk				Chr5	Pbr027347.1	==	Fvb3	FvH4_3g21580.1			Chr5	Pbr000044.1	==	scaffold_4	ppa003910m			Chr6	Pbr027204.1	==	Pa7	Pm024459
Chr6	Pbr030739.1	==	PAV_r1.0chr5	Pav_sc0000355.1_g250.1.mk				Chr6	Pbr027204.1	==	Fvb5	FvH4_5g07610.1			Chr5	Pbr027347.1	==	scaffold_4	ppa003323m			Chr7	Pbr018479.1	==	Pa5	Pm017821
Chr7	Pbr009709.1	==	PAV_r1.0chr2	Pav_sc0003033.1_g190.1.mk				Chr6	Pbr030739.1	==	Fvb5	FvH4_5g01550.1			Chr5	Pbr010041.1	==	scaffold_8	ppa003310m			Chr7	Pbr009709.1	==	Pa5	Pm016466
Chr7	Pbr018479.1	==	PAV_r1.0chr2	Pav_sc0000026.1_g470.1.mk				Chr7	Pbr009709.1	==	Fvb7	FvH4_7g02290.1			Chr5	Pbr026688.1	==	scaffold_8	ppa023981m			Chr9	Pbr005254.1	==	Pa3	Pm012494
Chr9	Pbr005254.1	==	PAV_r1.0chr3	Pav_sc0000157.1_g110.1.mk				Chr7	Pbr018479.1	==	Fvb7	FvH4_7g11120.1			Chr6	Pbr027204.1	==	scaffold_5	ppa016418m			Chr9	Pbr018056.1	==	Pa4	Pm015255
Chr9	Pbr018056.1	==	PAV_r1.0chr3	Pav_sc0000405.1_g450.1.mk				Chr9	Pbr029703.1	==	Fvb1	FvH4_1g13740.1			Chr6	Pbr030739.1	==	scaffold_5	ppa017030m			Chr9	Pbr041554.1	==	Pa4	Pm016121
Chr9	Pbr017879.1	==	PAV_r1.0chr3	Pav_sc0001543.1_g140.1.mk				Chr9	Pbr005254.1	==	Fvb3	FvH4_3g00670.1			Chr7	Pbr009709.1	==	scaffold_2	ppa005439m			Chr9	Pbr017879.1	==	Pa4	Pm014866
Chr9	Pbr016671.1	==	PAV_r1.0chr3	Pav_sc0000464.1_g350.1.mk				Chr9	Pbr005254.1	==	Fvb3	FvH4_3g24030.1			Chr7	Pbr018479.1	==	scaffold_2	ppa001781m			Chr9	Pbr016671.1	==	Pa4	Pm014329
Chr9	Pbr041554.1	==	PAV_r1.0chr3	Pav_sc0001080.1_g690.1.mk				Chr9	Pbr005254.1	==	Fvb6	FvH4_6g41200.1			Chr9	Pbr005254.1	==	scaffold_3	ppa003702m			Chr9	Pbr005254.1	==	Pa4	Pm015021
Chr9	Pbr005254.1	==	PAV_r1.0chr4	Pav_sc0002233.1_g260.1.mk				Chr9	Pbr018056.1	==	Fvb6	FvH4_6g43780.1			Chr9	Pbr018056.1	==	scaffold_3	ppa016112m			Chr9	Pbr029703.1	==	Pa8	Pm026588
Chr10	Pbr038494.1	==	PAV_r1.0chr4	Pav_sc0002233.1_g260.1.mk				Chr9	Pbr017879.1	==	Fvb6	FvH4_6g39610.1			Chr9	Pbr017879.1	==	scaffold_3	ppa005742m			Chr10	Pbr038494.1	==	Pa3	Pm012494
Chr10	Pbr033601.1	==	PAV_r1.0chr4	Pav_sc0003043.1_g130.1.mk				Chr9	Pbr041554.1	==	Fvb6	FvH4_6g53920.1			Chr9	Pbr016671.1	==	scaffold_3	ppa003206m			Chr10	Pbr033601.1	==	Pa3	Pm011106
Chr10	Pbr018237.1	==	PAV_r1.0chr8	Pav_sc0002271.1_g350.1.mk				Chr10	Pbr039366.2	==	Fvb2	FvH4_2g15030.1			Chr9	Pbr041554.1	==	scaffold_3	ppa024399m			Chr10	Pbr039366.2	==	Pa6	Pm022704
Chr10	Pbr039366.2	==	PAV_r1.0chr8	Pav_sc0005418.1_g120.1.mk				Chr10	Pbr011071.1	==	Fvb2	FvH4_2g21170.1			Chr9	Pbr005254.1	==	scaffold_4	ppa003910m			Chr10	Pbr011071.1	==	Pa6	Pm020564
Chr10	Pbr011071.1	==	PAV_r1.0chr8	Pav_sc0000583.1_g990.1.mk				Chr10	Pbr018237.1	==	Fvb2	FvH4_2g12280.1			Chr9	Pbr029703.1	==	scaffold_7	ppa003675m			Chr11	Pbr017325.1	==	Pa1	Pm000313
Chr11	Pbr018917.1	==	PAV_r1.0chr2	Pav_sc0000554.1_g600.1.mk				Chr10	Pbr038494.1	==	Fvb3	FvH4_3g00670.1			Chr10	Pbr038494.1	==	scaffold_4	ppa003910m			Chr11	Pbr017325.1	==	Pa1	Pm002956
Chr11	Pbr017325.1	==	PAV_r1.0chr6	Pav_sc0000206.1_g120.1.mk				Chr10	Pbr033601.1	==	Fvb3	FvH4_3g14680.1			Chr10	Pbr033601.1	==	scaffold_4	ppa004256m			Chr11	Pbr018917.1	==	Pa1	Pm000713
Chr11	Pbr018916.1	==	PAV_r1.0chr6	Pav_sc0001812.1_g060.1.mk				Chr11	Pbr018916.1	==	Fvb3	FvH4_3g36540.1			Chr10	Pbr018237.1	==	scaffold_8	ppa017519m			Chr11	Pbr018916.1	==	Pa1	Pm002685
Chr11	Pbr018921.1	==	PAV_r1.0chr6	Pav_sc0001812.1_g050.1.mk				Chr11	Pbr018917.1	==	Fvb3	FvH4_3g36570.1			Chr10	Pbr011071.1	==	scaffold_8	ppa023981m			Chr11	Pbr018916.1	==	Pa5	Pm018822
Chr11	Pbr018923.1	==	PAV_r1.0chr6	Pav_sc0001812.1_g030.1.br				Chr11	Pbr018918.1	==	Fvb3	FvH4_3g36660.1			Chr10	Pbr039366.2	==	scaffold_8	ppa003310m			Chr12	Pbr028236.1	==	Pa1	Pm002855
Chr11	Pbr017325.1	==	PAV_r1.0chr6	Pav_sc0001699.1_g490.1.mk				Chr11	Pbr018920.1	==	Fvb3	FvH4_3g36690.1			Chr11	Pbr018916.1	==	scaffold_2	ppa021438m			Chr12	Pbr028512.1	==	Pa1	Pm002956
Chr12	Pbr028512.1	==	PAV_r1.0chr6	Pav_sc0001699.1_g490.1.mk				Chr11	Pbr017325.1	==	Fvb3	FvH4_3g41310.1			Chr11	Pbr029392.1	==	scaffold_4	ppa005243m			Chr13	Pbr011960.1	==	Pa2	Pm008348
Chr12	Pbr028236.1	==	PAV_r1.0chr6	Pav_sc0001341.1_g120.1.mk				Chr11	Pbr041202.1	==	Fvb5	FvH4_5g39080.1			Chr11	Pbr018916.1	==	scaffold_6	ppa001883m			Chr13	Pbr010864.1	==	Pa5	Pm019863
Chr13	Pbr011960.1	==	PAV_r1.0chr1	Pav_sc0002106.1_g340.1.mk				Chr11	Pbr018916.1	==	Fvb6	FvH4_6g13520.1			Chr11	Pbr017325.1	==	scaffold_6	ppa025834m			Chr14	Pbr018291.1	==	Pa4	Pm013263
Chr14	Pbr018291.1	==	PAV_r1.0chr3	Pav_sc0001580.1_g470.1.mk				Chr11	Pbr018916.1	==	Fvb7	FvH4_7g22720.1			Chr11	Pbr018916.1	==	scaffold_6	ppa019574m			Chr14	Pbr036939.1	==	Pa7	Pm024459
Chr15	Pbr033333.1	==	PAV_r1.0chr3	Pav_sc0000405.1_g450.1.mk				Chr12	Pbr028236.1	==	Fvb6	FvH4_6g10940.1			Chr11	Pbr018921.1	==	scaffold_6	ppa002392m			Chr15	Pbr024319.1	==	Pa1	Pm002381
Chr15	Pbr024319.1	==	PAV_r1.0chr6	Pav_sc0000666.1_g050.1.mk				Chr12	Pbr028512.1	==	Fvb6	FvH4_6g09040.1			Chr11	Pbr041202.1	==	scaffold_8	ppa023374m			Chr15	Pbr037013.1	==	Pa2	Pm004863
Chr15	Pbr014306.1	==	PAV_r1.0chr7	Pav_sc0000099.1_g940.1.mk				Chr13	Pbr010864.1	==	Fvb7	FvH4_7g30100.1			Chr12	Pbr028512.1	==	scaffold_6	ppa001546m			Chr15	Pbr033333.1	==	Pa4	Pm015255
Chr16	Pbr012085.1	==	PAV_r1.0chr1	Pav_sc0000221.1_g210.1.mk				Chr14	Pbr036939.1	==	Fvb5	FvH4_5g07610.1			Chr12	Pbr028236.1	==	scaffold_6	ppa020043m			Chr15	Pbr017263.1	==	Pa8	Pm026588
Chr16	Pbr013644.1	==	PAV_r1.0chr6	Pav_sc0001699.1_g490.1.mk				Chr15	Pbr014306.1	==	Fvb1	FvH4_1g13400.1			Chr13	Pbr011960.1	==	scaffold_1	ppa024047m			Chr15	Pbr014306.1	==	Pa8	Pm026616
Chr17	Pbr024549.1	==	PAV_r1.0chr1	Pav_sc0000221.1_g210.1.mk				Chr15	Pbr017263.1	==	Fvb1	FvH4_1g13740.1			Chr13	Pbr010864.1	==	scaffold_2	ppa002688m			Chr16	Pbr013644.1	==	Pa1	Pm002956
Chr17	Pbr021861.1	==	PAV_r1.0chr3	Pav_sc0001080.1_g690.1.mk				Chr15	Pbr024319.1	==	Fvb1	FvH4_1g17690.1			Chr14	Pbr018291.1	==	scaffold_3	ppa022653m			Chr16	Pbr012085.1	==	Pa2	Pm006304
Chr17	Pbr024549.1	==	PAV_r1.0chr3	Pav_sc0000464.1_g350.1.mk				Chr15	Pbr037013.1	==	Fvb2	FvH4_2g26540.1			Chr14	Pbr036939.1	==	scaffold_5	ppa016418m			Chr17	Pbr024549.1	==	Pa2	Pm006304
								Chr15	Pbr033333.1	==	Fvb6	FvH4_6g43780.1			Chr15	Pbr037013.1	==	scaffold_1	ppa018977m			Chr17	Pbr021861.1	==	Pa4	Pm016121
								Chr16	Pbr012085.1	==	Fvb4	FvH4_4g34110.1			Chr15	Pbr033333.1	==	scaffold_3	ppa016112m			Chr17	Pbr024549.1	==	Pa4	Pm014329
								Chr16	Pbr013644.1	==	Fvb6	FvH4_6g09040.1			Chr15	Pbr024319.1	==	scaffold_6	ppa004454m
								Chr17	Pbr021861.1	==	Fvb6	FvH4_6g53920.1			Chr15	Pbr017263.1	==	scaffold_7	ppa003675m
															Chr15	Pbr014306.1	==	scaffold_7	ppa003124m
															Chr16	Pbr012085.1	==	scaffold_1	ppa005944m
															Chr16	Pbr013644.1	==	scaffold_6	ppa001546m
															Chr17	Pbr021861.1	==	scaffold_3	ppa024399m
															Chr17	Pbr024549.1	==	scaffold_3	ppa003206m
