# Supplementary material for: Integrative Analysis of the GRAS Genes From Chinese White Pear (Pyrus bretschneideri): A Critical Role in Leaf Regeneration
Source: Front Plant Sci. 2022 Jun 6;13:898786. doi: 10.3389/fpls.2022.898786 (PMC9208361; doi:10.3389/fpls.2022.898786)
Supplement: Supplementary Table S3 — Gene duplication events and synonymous and non-synonymous value of GRAS gene family in Pyrus bretschenedri. [file Table_3.XLSX]

## Sheet: Mode of duplication
Table S3 Gene duplication events and synonymous and non-synonymous value of GRAS gene family in Pyrus bretschenedri
Mode of duplication	Duplicate 1	starting point	Ending point	Location	Duplicate 2	starting point	Ending point	Location	E-value	Ka	Ks	ka/ks
	Pbr018647.1	8723677	8726310	Chr1	Pbr010041.1	5025916	5027649	Chr5	1.1e-72	-2	-2	1
	Pbr022956.1	6749386	6750759	Chr2	Pbr027642.1	9087513	9089981	Chr3	5.9e-177	0.182617	1.63561	0.11165
	Pbr014064.1	19136535	19138227	Chr2	Pbr024549.1	7409679	7412242	Chr17	3.4e-120	0.465768	1.35293	0.344267
	Pbr005472.1	15207859	15209910	Chr2	Pbr016671.1	3164469	3166818	Chr9	1.6e-49	0.979336	2.14431	0.456714
	Pbr001048.1	11931777	11933853	Chr2	Pbr032804.1	11246761	11248137	Chr4	3.8e-124	-2	-2	1
	Pbr017150.1	1481868	1484320	Chr2	Pbr034525.1	10474326	10477423	Chr13	0	0.117749	0.263053	0.447623
	Pbr040573.1	5001698	5003889	Chr3	Pbr005254.1	14844159	14847748	Chr9	5.7e-140	-2	-2	1
	Pbr024234.1	7078869	7082407	Chr3	Pbr027347.1	13664269	13667497	Chr5	1.7e-293	0.05696	0.1723	0.330586
	Pbr022696.1	1206980	1208863	Chr3	Pbr016671.1	3164469	3166818	Chr9	4.3e-45	1.01684	2.90862	0.349595
	Pbr027642.1	9087513	9089981	Chr3	Pbr028415.1	1905713	1907128	Chr6	1.6e-254	0.0281635	0.170607	0.165078
	Pbr003874.1	26052391	26053785	Chr3	Pbr018916.1	27142717	27145654	Chr11	2.6e-212	0.123286	0.20186	0.610751
	Pbr003875.1	26042952	26045859	Chr3	Pbr018917.1	27149838	27152273	Chr11	1.9e-209	0.346153	1.15776	0.298984
	Pbr003871.1	26113986	26116293	Chr3	Pbr018923.1	27194686	27197183	Chr11	1.3e-231	0.215991	0.56534	0.382054
	Pbr003868.1	26123564	26125999	Chr3	Pbr018923.1	27194686	27197183	Chr11	0	0.056126	0.149015	0.376646
	Pbr003869.1	26120474	26122330	Chr3	Pbr018922.1	27192146	27194131	Chr11	1.7e-260	0.0756804	0.159024	0.475906
	Pbr003870.1	26116987	26119020	Chr3	Pbr003868.1	26123564	26125999	Chr3	6.6e-225	0.247026	0.555504	0.444687
	Pbr003873.1	26061786	26065202	Chr3	Pbr018917.1	27149838	27152273	Chr11	0	0.0667538	0.183583	0.363615
	Pbr003867.1	26129866	26131905	Chr3	Pbr018924.1	27203765	27206275	Chr11	9.4e-304	0.112692	0.2084	0.540749
	Pbr032804.1	11246761	11248137	Chr4	Pbr010041.1	5025916	5027649	Chr5	2.4e-40	0.932731	1.50957	0.617877
	Pbr019423.1	3272182	3273792	Chr4	Pbr028236.1	4974528	4976132	Chr12	4.2e-267	0.0643459	0.242425	0.265426
	Pbr019422.1	3269077	3270682	Chr4	Pbr028237.1	4983570	4985174	Chr12	1.2e-221	0.0922579	0.203214	0.453993
Dispersed duplication (DSD)	Pbr010041.1	5025916	5027649	Chr5	Pbr005254.1	14844159	14847748	Chr9	8.1e-123	-2	-2	1
	Pbr027347.1	13664269	13667497	Chr5	Pbr005254.1	14844159	14847748	Chr9	1.3e-139	-2	-2	1
	Pbr026688.1	20171220	20174043	Chr5	Pbr028512.1	442766	445853	Chr12	3.5e-114	0.594977	1.01898	0.583895
	Pbr030739.1	12026904	12028940	Chr6	Pbr016671.1	3164469	3166818	Chr9	3.6e-61	0.923269	3.29305	0.280369
	Pbr009709.1	1927733	1929109	Chr7	Pbr027642.1	9087513	9089981	Chr3	1e-176	0.197135	1.89067	0.104267
	Pbr041554.1	22163356	22166437	Chr9	Pbr028512.1	442766	445853	Chr12	4.1e-84	0.887867	1.87112	0.47451
	Pbr017879.1	17588599	17590618	Chr9	Pbr028512.1	442766	445853	Chr12	3.2e-127	0.50458	0.776442	0.649863
	Pbr018056.1	16764777	16766159	Chr9	Pbr023527.1	22403894	22405315	Chr15	1.5e-103	0.510775	3.82108	0.133673
	Pbr029703.1	14033138	14034815	Chr9	Pbr017150.1	1481868	1484320	Chr2	4e-38	0.886779	1.43143	0.619504
	Pbr039366.2	20943299	20945035	Chr10	Pbr005254.1	14844159	14847748	Chr9	1e-125	-2	-2	1
	Pbr038494.1	5966071	5969736	Chr10	Pbr041406.1	6409037	6412057	Chr3	2.6e-147	0.377931	1.6203	0.233247
	Pbr011071.1	9375399	9377366	Chr10	Pbr028512.1	442766	445853	Chr12	3.6e-114	0.594069	0.967898	0.613772
	Pbr018237.1	23948393	23949820	Chr10	Pbr041554.1	22163356	22166437	Chr9	9.5e-53	0.897953	1.09722	0.818387
	Pbr033601.1	7897979	7899122	Chr10	Pbr024234.1	7078869	7082407	Chr3	1.7e-07	3.04587	0.640715	4.75385
	Pbr017325.1	24535189	24536574	Chr11	Pbr021861.1	24129853	24132643	Chr17	6.2e-57	0.939303	1.16815	0.804096
	Pbr018921.1	27188604	27190742	Chr11	Pbr003868.1	26123564	26125999	Chr3	1.9e-214	0.260569	0.649682	0.401072
	Pbr018918.1	27161734	27165458	Chr11	Pbr018916.1	27142717	27145654	Chr11	1.1e-197	0.319114	1.03733	0.307632
	Pbr018924.1	27203765	27206275	Chr11	Pbr018920.1	27184874	27187283	Chr11	3.8e-180	0.370223	1.2243	0.302396
	Pbr041202.1	250880	252772	Chr11	Pbr016671.1	3164469	3166818	Chr9	1.4e-43	1.05359	1.8801	0.560388
	Pbr018920.1	27184874	27187283	Chr11	Pbr018923.1	27194686	27197183	Chr11	1e-241	0.191036	0.533256	0.358245
	Pbr028236.1	4974528	4976132	Chr12	Pbr037013.1	35799153	35800694	Chr15	1.9e-25	1.15664	2.84662	0.406321
	Pbr028237.1	4983570	4985174	Chr12	Pbr037013.1	35799153	35800694	Chr15	4.7e-24	1.12319	2.50647	0.448116
	Pbr010864.1	615690	618395	Chr13	Pbr010041.1	5025916	5027649	Chr5	5.7e-72	-2	-2	1
	Pbr011960.1	9706912	9708237	Chr13	Pbr041202.1	250880	252772	Chr11	1.7e-112	0.442828	1.04312	0.424524
	Pbr011959.1	9709528	9711330	Chr13	Pbr041202.1	250880	252772	Chr11	7.4e-135	0.437982	2.82987	0.154771
	Pbr018291.1	9428972	9430707	Chr14	Pbr032804.1	11246761	11248137	Chr4	1.1e-28	0.972304	1.67079	0.581944
	Pbr036939.1	13481102	13482700	Chr14	Pbr021861.1	24129853	24132643	Chr17	1.8e-84	0.76033	1.3946	0.545195
	Pbr014306.1	18080636	18082875	Chr15	Pbr039366.2	20943299	20945035	Chr10	1.3e-49	-2	-2	1
	Pbr037013.1	35799153	35800694	Chr15	Pbr028512.1	442766	445853	Chr12	3.4e-56	0.967145	1.14496	0.844698
	Pbr024319.1	24500431	24502264	Chr15	Pbr032804.1	11246761	11248137	Chr4	1.4e-126	-2	-2	1
	Pbr017263.1	20040104	20041817	Chr15	Pbr029703.1	14033138	14034815	Chr9	7.5e-237	0.0793789	0.311313	0.254981
	Pbr012085.1	3148429	3150784	Chr16	Pbr024549.1	7409679	7412242	Chr17	1.1e-208	0.264077	1.21959	0.216529
	Pbr013644.1	9283809	9286466	Chr16	Pbr017879.1	17588599	17590618	Chr9	3.4e-122	0.480958	0.884355	0.543851
	Pbr021861.1	24129853	24132643	Chr17	Pbr027204.1	1032971	1034560	Chr6	4.8e-85	0.755998	1.37781	0.548697
	Pbr007753.1	16710408	16711739	Chr17	Pbr018056.1	16764777	16766159	Chr9	4.2e-236	0.0296198	0.100633	0.294335
Proximal duplication (PD)	Pbr003871.1	26113986	26116293	Chr3	Pbr003868.1	26123564	26125999	Chr3	1.1e-243	0.204759	0.564426	0.362774
	Pbr003874.1	26052391	26053785	Chr3	Pbr003873.1	26061786	26065202	Chr3	1.7e-155	0.237961	0.542531	0.438613
	Pbr003875.1	26042952	26045859	Chr3	Pbr003874.1	26052391	26053785	Chr3	3.6e-232	0.0647795	0.110563	0.585905
	Pbr003868.1	26123564	26125999	Chr3	Pbr003867.1	26129866	26131905	Chr3	2e-176	0.363514	1.07864	0.337013
	Pbr003869.1	26120474	26122330	Chr3	Pbr003868.1	26123564	26125999	Chr3	6.3e-210	0.171751	0.392809	0.437237
	Pbr003870.1	26116987	26119020	Chr3	Pbr003869.1	26120474	26122330	Chr3	1.3e-191	0.196099	0.408644	0.479876
	Pbr019422.1	3269077	3270682	Chr4	Pbr019423.1	3272182	3273792	Chr4	2.2e-249	0.0671912	0.204709	0.328228
Tandem duplication (TD)	Pbr018916.1	27142717	27145654	Chr11	Pbr018917.1	27149838	27152273	Chr11	5e-210	0.33434	1.1963	0.279479
	Pbr018922.1	27192146	27194131	Chr11	Pbr018923.1	27194686	27197183	Chr11	5.5e-232	0.18851	0.49452	0.381199
	Pbr018923.1	27194686	27197183	Chr11	Pbr018924.1	27203765	27206275	Chr11	5.1e-185	0.353905	1.24757	0.283677
	Pbr018917.1	27149838	27152273	Chr11	Pbr018918.1	27161734	27165458	Chr11	0	0.0323185	0.090447	0.35732
	Pbr018920.1	27184874	27187283	Chr11	Pbr018921.1	27188604	27190742	Chr11	3.4e-211	0.242339	0.521705	0.464513
	Pbr028236.1	4974528	4976132	Chr12	Pbr028237.1	4983570	4985174	Chr12	5e-252	0.0547979	0.181366	0.302139
	Pbr011960.1	9706912	9708237	Chr13	Pbr011959.1	9709528	9711330	Chr13	3.7e-115	0.414278	1.29814	0.319131
	Pbr018647.1	8723677	8726310	Chr1	Pbr010864.1	615690	618395	Chr13	1.5e-239	0.0640239	0.204975	0.31235
	Pbr022956.1	6749386	6750759	Chr2	Pbr009709.1	1927733	1929109	Chr7	8.1e-243	0.0396633	0.19765	0.200674
	Pbr040573.1	5001698	5003889	Chr3	Pbr027347.1	13664269	13667497	Chr5	8.3e-293	0.0581386	0.171067	0.339858
	Pbr000044.1	28119430	28121040	Chr5	Pbr005254.1	14844159	14847748	Chr9	2.7e-165	0.309565	1.84473	0.167811
	Pbr039366.2	20943299	20945035	Chr10	Pbr010041.1	5025916	5027649	Chr5	1.6e-296	0.0403944	0.180413	0.2239
	Pbr038494.1	5966071	5969736	Chr10	Pbr000044.1	28119430	28121040	Chr5	2.3e-268	0.0731411	0.196858	0.371541
	Pbr011071.1	9375399	9377366	Chr10	Pbr026688.1	20171220	20174043	Chr5	9.6e-261	0.0539033	0.291735	0.184768
	Pbr018916.1	27142717	27145654	Chr11	Pbr003875.1	26042952	26045859	Chr3	0	0.0702592	0.190552	0.368714
	Pbr017325.1	24535189	24536574	Chr11	Pbr023110.1	18060361	18061734	Chr3	4.3e-207	0.0385206	0.190854	0.201833
	Pbr018921.1	27188604	27190742	Chr11	Pbr003870.1	26116987	26119020	Chr3	7.1e-302	0.0717786	0.157407	0.456006
	Pbr018924.1	27203765	27206275	Chr11	Pbr003868.1	26123564	26125999	Chr3	2.5e-187	0.354569	1.15025	0.308255
Transposed duplication (TRD)	Pbr041202.1	250880	252772	Chr11	Pbr022696.1	1206980	1208863	Chr3	3.2e-290	0.0672889	0.17222	0.390715
	Pbr029392.1	10951153	10952568	Chr11	Pbr027642.1	9087513	9089981	Chr3	2.9e-251	0.0310657	0.162476	0.191202
	Pbr029392.1	10951153	10952568	Chr11	Pbr028415.1	1905713	1907128	Chr6	5.4e-266	0.00648703	0.0122483	0.529627
	Pbr018920.1	27184874	27187283	Chr11	Pbr003871.1	26113986	26116293	Chr3	0	0.0808073	0.182018	0.443952
	Pbr028512.1	442766	445853	Chr12	Pbr013644.1	9283809	9286466	Chr16	7.4e-244	0.0274636	0.202764	0.135447
	Pbr028236.1	4974528	4976132	Chr12	Pbr019422.1	3269077	3270682	Chr4	1e-244	0.0756741	0.23649	0.319988
	Pbr011960.1	9706912	9708237	Chr13	Pbr022696.1	1206980	1208863	Chr3	1.1e-106	0.480342	1.02586	0.468235
	Pbr036939.1	13481102	13482700	Chr14	Pbr027204.1	1032971	1034560	Chr6	1.1e-275	0.0469002	0.152363	0.307818
	Pbr014306.1	18080636	18082875	Chr15	Pbr005472.1	15207859	15209910	Chr2	1.6e-307	0.0448119	0.227278	0.197168
	Pbr024319.1	24500431	24502264	Chr15	Pbr001048.1	11931777	11933853	Chr2	3.7e-236	0.0221563	0.14143	0.156659
	Pbr033333.1	41412837	41414168	Chr15	Pbr018056.1	16764777	16766159	Chr9	7.9e-251	0.00295543	0.00321286	0.919875
	Pbr021861.1	24129853	24132643	Chr17	Pbr041554.1	22163356	22166437	Chr9	0	0.0335641	0.207565	0.161704
	Pbr024549.1	7409679	7412242	Chr17	Pbr016671.1	3164469	3166818	Chr9	1.1e-295	0.0514306	0.275535	0.186657
	Pbr018647.1	8723677	8726310	Chr1	Pbr010864.1	615690	618395	Chr13	1.5e-239	0.0640239	0.204975	0.31235
	Pbr022956.1	6749386	6750759	Chr2	Pbr009709.1	1927733	1929109	Chr7	8.1e-243	0.0396633	0.19765	0.200674
	Pbr040573.1	5001698	5003889	Chr3	Pbr027347.1	13664269	13667497	Chr5	8.3e-293	0.0581386	0.171067	0.339858
	Pbr000044.1	28119430	28121040	Chr5	Pbr005254.1	14844159	14847748	Chr9	2.7e-165	0.309565	1.84473	0.167811
	Pbr039366.2	20943299	20945035	Chr10	Pbr010041.1	5025916	5027649	Chr5	1.6e-296	0.0403944	0.180413	0.2239
	Pbr038494.1	5966071	5969736	Chr10	Pbr000044.1	28119430	28121040	Chr5	2.3e-268	0.0731411	0.196858	0.371541
	Pbr011071.1	9375399	9377366	Chr10	Pbr026688.1	20171220	20174043	Chr5	9.6e-261	0.0539033	0.291735	0.184768
	Pbr018916.1	27142717	27145654	Chr11	Pbr003875.1	26042952	26045859	Chr3	0	0.0702592	0.190552	0.368714
	Pbr017325.1	24535189	24536574	Chr11	Pbr023110.1	18060361	18061734	Chr3	4.3e-207	0.0385206	0.190854	0.201833
	Pbr018921.1	27188604	27190742	Chr11	Pbr003870.1	26116987	26119020	Chr3	7.1e-302	0.0717786	0.157407	0.456006
	Pbr018924.1	27203765	27206275	Chr11	Pbr003868.1	26123564	26125999	Chr3	2.5e-187	0.354569	1.15025	0.308255
Whole-genome duplication (WGD)	Pbr041202.1	250880	252772	Chr11	Pbr022696.1	1206980	1208863	Chr3	3.2e-290	0.0672889	0.17222	0.390715
	Pbr029392.1	10951153	10952568	Chr11	Pbr027642.1	9087513	9089981	Chr3	2.9e-251	0.0310657	0.162476	0.191202
	Pbr029392.1	10951153	10952568	Chr11	Pbr028415.1	1905713	1907128	Chr6	5.4e-266	0.00648703	0.0122483	0.529627
	Pbr018920.1	27184874	27187283	Chr11	Pbr003871.1	26113986	26116293	Chr3	0	0.0808073	0.182018	0.443952
	Pbr028512.1	442766	445853	Chr12	Pbr013644.1	9283809	9286466	Chr16	7.4e-244	0.0274636	0.202764	0.135447
	Pbr028236.1	4974528	4976132	Chr12	Pbr019422.1	3269077	3270682	Chr4	1e-244	0.0756741	0.23649	0.319988
	Pbr011960.1	9706912	9708237	Chr13	Pbr022696.1	1206980	1208863	Chr3	1.1e-106	0.480342	1.02586	0.468235
	Pbr036939.1	13481102	13482700	Chr14	Pbr027204.1	1032971	1034560	Chr6	1.1e-275	0.0469002	0.152363	0.307818
	Pbr014306.1	18080636	18082875	Chr15	Pbr005472.1	15207859	15209910	Chr2	1.6e-307	0.0448119	0.227278	0.197168
	Pbr024319.1	24500431	24502264	Chr15	Pbr001048.1	11931777	11933853	Chr2	3.7e-236	0.0221563	0.14143	0.156659
	Pbr033333.1	41412837	41414168	Chr15	Pbr018056.1	16764777	16766159	Chr9	7.9e-251	0.00295543	0.00321286	0.919875
	Pbr021861.1	24129853	24132643	Chr17	Pbr041554.1	22163356	22166437	Chr9	0	0.0335641	0.207565	0.161704
	Pbr024549.1	7409679	7412242	Chr17	Pbr016671.1	3164469	3166818	Chr9	1.1e-295	0.0514306	0.275535	0.186657

## Sheet: Number of all duplication
Mode of duolication	Gene pairs
Transposed duplication (TRD)	24
Dispersed duplication (DSD)	56
Proximal duplication (PD)	1
Tandem duplication (TD)	13
Whole-genome duplication (WGD)	24
