# Supplementary material for: Integrative Analysis of the GRAS Genes From Chinese White Pear (Pyrus bretschneideri): A Critical Role in Leaf Regeneration
Source: Front Plant Sci. 2022 Jun 6;13:898786. doi: 10.3389/fpls.2022.898786 (PMC9208361; doi:10.3389/fpls.2022.898786)
Supplement: Supplementary Table S4 — GO annotation functional analysis of GRAS family in Pyrus bretschenedri. [file Table_4.XLSX]

## Sheet: Functional and subcellular loca
Table S4 Go annotation functional analysis of GRAS family
//
SN 1;
SD Pbr000044.1 ;
SQ MKASQQHRGVALYHQPVQQIDRCGFQILEKSMYPDTGSQGNNLSFQNYKDDKEQFFTLDSSPATAFLTCDSPSAISGLSNRSPFSPQGSHSCFSDQHHSSGNNYGSPISGCSIIVDDDFKSKLREMEVSLLGPDSDIVDSHFCSHRSGMARWSHSQIAETIPKLNLKNVLIDCARAISENEFDNAISLMEVLGQMVSVSGEPMQRLGAYMLEGLRARLEGSGSSIYKTLKCEVPTSSELMSYMSVLYRICPYWRFAYLSANVVIREALENEPRIHIIDFQIAQGSQWIPLIQDLACQPGGPPRIRITGVDDTQSEHARGGGLHIVSKRLSELAASCNVPFEFNAAAMCGSEVELHNLRIQPGEAIAVNFPYVLHHMPDESVSTENHRDRLLRLVKS…
CP Plasmamembrane;
CP Nuclear;
MF nucleic acid binding transcription factor activity;
MF DNA binding;
BP biosynthetic process;
BP cellular nitrogen compound metabolic process;
BP response to stress;
BP signal transduction;
BP cell differentiation;
BP anatomical structure development;
BP cell division;
BP cell cycle;
BP homeostatic process;
BP symbiosis, encompassing mutualism through parasitism;
CC intracellular;
CC cell;
CC nucleus;
CC cytoplasm;
CC organelle;
//
SN 2;
SD Pbr001048.1 ;
SQ MDTLFRLVNLQSDHHQSFTNSTTARTSTPTTTTTTSSSSRSSFLSNPPHPNYPHQDDDVGEECFNFFMDEEDFSSSSSKHYFPSNHPTPPTPNPLPTITTTPTPADFSFSPSLVNFELSNDKWAPELLLETARAIADKNSSRVQQLMWMLNELGSPYGDTDQKLASYFLQALFSRMTDSGDSCYRTLISASEKTCSFESTRKTVLKFQEVSPWTTFGHVASNGAIMEAFDGEPKLHIIDISNTYCTQWPTLLEALATRTDETPHLRLTTVVANRANDGSGGAAAQKVMKEIGARMEKFARLMGVPFKFNAVHHSGDLSELNLSEFDIRDDEALAINCVGTLHSVQSVGNRRDYLVSAFRSLRPRIITLVEEEADLDVGVDGIDFVHGFQECLRWFR…
CP Plasmamembrane;
CP Nuclear;
MF nucleic acid binding transcription factor activity;
MF DNA binding;
BP cell cycle;
BP biosynthetic process;
BP cellular nitrogen compound metabolic process;
BP homeostatic process;
BP anatomical structure development;
BP cell division;
BP response to stress;
BP signal transduction;
BP cell differentiation;
BP symbiosis, encompassing mutualism through parasitism;
CC intracellular;
CC cell;
CC nucleus;
CC cytoplasm;
CC organelle;
//
SN 3;
SD Pbr003262.1 ;
SQ MEDIDEEEELLNLSLAIVTSSGRERFKKRKRSRDDGIANSILVSPLNSYEGCEGKIFRLLQMREQMLKKLDLHKKKGVAFDDEDGKGLHLIHMLLITATAVNENNVGSALEHLTELYKIVSLCGDSVQRVVAYFADGLAARLLTRKSPFYDMIMKEPTSEEEFVAFTALYRVSPYYQFAHFTANQAIIEAFEKEQEKNNRALHVIDFDVSYGFQWPSLIQSLSEKASSSNRISLRITGFGRSVDELRETENRLTSFSKGFRNLVFEFQGLLRSSKLINLRKKRNETIAVNLVFHLNTLSNNLKISDLLNSVHLLDPSIVILVEQEGSKSPRSFLSRFMETLHYFAAMFDSLDDCLPLESAERLSIEKNHLGKEIKSMLNYDNNNDENCPKTEKMET…
CP Nuclear;
MF nucleic acid binding transcription factor activity;
MF DNA binding;
BP biosynthetic process;
BP cellular nitrogen compound metabolic process;
BP anatomical structure development;
BP cell division;
BP response to stress;
BP signal transduction;
BP cell differentiation;
BP symbiosis, encompassing mutualism through parasitism;
BP cell cycle;
BP homeostatic process;
CC intracellular;
CC cell;
CC nucleus;
CC organelle;
CC cytoplasm;
//
SN 4;
SD Pbr003867.1 ;
SQ MDTLEDELPSPMNKSVIEQVDDSNANPVHEFGASHDFTDHNFFPVNSDPSDNLPSLPGVSTEVNFPERSEASNAILKYISEMLMEEEEYLVNKPCMLQECLALQAAEKSLHDVLVQDQNPSSSDPLNFIHRNVEAPNEGSNHSSTGSIAAGNRVGLDWGSVQDVFESSRAQIPNPLVLSGEGEITHLKHNSSSVVELREQQGNDVSFNLDKDGSDSSNGSRSKRSHQREDEDSLDDWRRNKDPAVYADEFELPQLFDEVLLCQGEKQESNSCSPKESEKLQLNRKSKGSKGKKTRKKKLDDNAGMVDLWTLLTICAQSVASYDKRKANEQLKQIRLNSSPYGDDTQRLAHYVANGLELRLGADVPSNASLPSSEMSAADILKAYQTYITACPFQKM…
CP Nuclear;
MF nucleic acid binding transcription factor activity;
MF DNA binding;
BP biosynthetic process;
BP cellular nitrogen compound metabolic process;
BP response to stress;
BP signal transduction;
BP anatomical structure development;
BP cell division;
BP cell differentiation;
BP cell cycle;
BP homeostatic process;
BP symbiosis, encompassing mutualism through parasitism;
CC intracellular;
CC cell;
CC nucleus;
CC organelle;
CC cytoplasm;
//
SN 5;
SD Pbr003868.1 ;
SQ MKNFQFLSTQNLVNGFQVNHEPTNPLFLPTTTDHPTDSGLSSSGSDGDCFDISDSRPVLKYISDILLEEDLEDKPCMLQNCLALHAAEKSFYDVLNAKDPPSPDQPPLQVYHSFEHSDDDSSQSCHSSNDSRSARTDSVFDSSETLLASDSISGNFGGVGEARTLIPNGRYGIIDVERYQSVPPGGNTLRRNFAPEPENDGYISANRLKGKKNRQREDGDYADEGRSSKQSAALGDDAEPQEMFDRVLLCHVNHTHESCIRDKPLGSEVCEKLQPTKQSKGSKTTRSKKQNNNREVVDLTNLLTQCAQAVASYDQRTASELLKQIRKHSSPYGDATERLSHYFADGLEARLAGTRTPLYSPLLSIQTPVAEILKAYQMYVKYCPFKHMLHFLSNRT…
CP Nuclear;
MF nucleic acid binding transcription factor activity;
MF DNA binding;
BP biosynthetic process;
BP cellular nitrogen compound metabolic process;
BP response to stress;
BP signal transduction;
BP cell differentiation;
BP anatomical structure development;
BP cell division;
BP cell cycle;
BP homeostatic process;
BP symbiosis, encompassing mutualism through parasitism;
CC intracellular;
CC cell;
CC nucleus;
CC cytoplasm;
CC organelle;
//
SN 6;
SD Pbr003869.1 ;
SQ MDSNPGSDGDTIDISDCNHPVLKYISDILLEEDLEGKPCMLQDYLTLKAAEKSFYDVLNPKGPPSFIQSPLPKGKKNHLREDSDYTEEGRKNKQSAASNDGPEPQEMFDEVLLCPDANHEFEPCFHDQSVKTDGSGKLRSNKQPKISKTARSKTKHKNRKVVYLCTMLTQCAQAVASHDQRTASELIKKIGQHSSPNGDATERLAYYFANALEARLAGSRTPSYSPLLSTQTPATEILKAHQVYVTSCPFKKMLYFFANRKIMKLAENDTRVHIIHFGISYGFQWPCCIQYLSKRPVGPPNLRITAIELPQPGFRPTERVEETMCRLEKYAKRFDVPFEYNVIAQKWETIRFEDLKVDKYEMIVVNCMRRLRHIRDETVVVSSPRDTVLNLIKKIN…
CP Nuclear;
MF nucleic acid binding transcription factor activity;
MF DNA binding;
BP biosynthetic process;
BP cellular nitrogen compound metabolic process;
BP response to stress;
BP signal transduction;
BP cell differentiation;
BP anatomical structure development;
BP cell division;
BP cell cycle;
BP homeostatic process;
BP symbiosis, encompassing mutualism through parasitism;
CC intracellular;
CC cell;
CC nucleus;
CC cytoplasm;
CC organelle;
//
SN 7;
SD Pbr003870.1 ;
SQ MEGFEFGDGSNLVYSDENLADGFRENHESTNPNYIPSNLDHPSDLSTSLIPGSDAVTIDTNDCNQPVLKYISDILLEEDLEGKPCMLQESLALQVAEKYFYDALNPEDPPLLNQPSFSVCQSFENLDVGCHSSDGSIASFPSSNGSISANRGWVWDLSQPSHGIKFLPNESCETIDLERDQLVPPCSDQWPPGPYTLIGNLASENDGYNSINGPKGKKNHRREDGYDAEEGRRNKQSATASDNSDLQEIYDTVLQSVNHEPDSCLHDESSKTKGNRMLQHKEQSKGSKSSRAKKQNSNRKVVDLCRLLTECAEAVASYDQQAASELLKQIRQHSSPYGDSTQRLAHYFADGLEARLAGARTPSYCPLMMHSPATEILKAYQVYVTACPFKKMVHFF…
CP Nuclear;
MF nucleic acid binding transcription factor activity;
MF DNA binding;
BP biosynthetic process;
BP cellular nitrogen compound metabolic process;
BP response to stress;
BP signal transduction;
BP cell differentiation;
BP anatomical structure development;
BP cell division;
BP symbiosis, encompassing mutualism through parasitism;
BP cell cycle;
BP homeostatic process;
CC intracellular;
CC cell;
CC nucleus;
CC cytoplasm;
CC organelle;
//
SN 8;
SD Pbr003871.1 ;
SQ MDTLLERCDVSMERFNFGVHPHQNLVNGFKMDHESTYSIFLPTNVDHNSSDSSPPLNTGSDGDSTDPGDFNHPVLKHISDILLEEDLEGKPCMLQDCLALQAAEKSFFDVLNPRGPPSPNQPPLSHSLENPDDDSTPSSHSCNGTSIPSETSHFQSYLAESQSDNVLVSDPLSEMQSFGHFGGVGEACKFLPNESFGTIDLERCHLMSPGPGPCPPGIRTLMRRPENDGHNSTNILKGKKHHQREDGDYPEEGRSSKQPVAFADDSEPQEMFDEVLLSHGRHHFGNKQSKGSKTTRSKKQNSNAEIVDLSTLLTQCAQAVASYDQQTARERLQKIRHYSSPRGDAKQRLAHYFADGLEARLAGATTPSYSFLVGTQSSAAEILKAFQVSVSSSPFK…
CP Nuclear;
MF nucleic acid binding transcription factor activity;
MF DNA binding;
BP biosynthetic process;
BP cellular nitrogen compound metabolic process;
BP response to stress;
BP signal transduction;
BP cell differentiation;
BP anatomical structure development;
BP cell division;
BP cell cycle;
BP homeostatic process;
BP symbiosis, encompassing mutualism through parasitism;
CC intracellular;
CC cell;
CC nucleus;
CC cytoplasm;
CC organelle;
//
SN 9;
SD Pbr003873.1 ;
SQ MDHPTFNGVPDYMNGFSIDDLASSPNSSQFPNLINEYQFNQLSPDLNFMDNHFFTPPDFEQGNIVPKVSVTTIGESFVPSNSLSPPDEGSFSLPNTLSPGGGDTSSDDNDFSESVFKYVNQILMEENIEKKPCMFYDPLGLRMTEKSFYDVLGQQYPFSPNQPPYINPNAESPDGNISGNCTDCSGSSTNSGTSNSIDPQWVGDLGDQKSSFPQTYLPNDYPFQFNSNSSSQLSVPLENGVTRVGDGLRVGDEQHVDDVLQGSSVEEFVAQNIFTDSDSIFQFQRGLEEASKFLPKSTQLLVDLESNTVSPEVKAHVPIVTVKKEKSERKNSLNGSKGRKNHKREDVDLEEGRSSKQSAVYLEGTQESELSEMFDKVLLCTGGNNESQCDNVAFKN…
CP Cytoplasmic;
CP Nuclear;
MF nucleic acid binding transcription factor activity;
MF DNA binding;
BP biosynthetic process;
BP cellular nitrogen compound metabolic process;
BP response to stress;
BP signal transduction;
BP cell differentiation;
BP anatomical structure development;
BP cell division;
BP cell cycle;
BP homeostatic process;
BP symbiosis, encompassing mutualism through parasitism;
CC intracellular;
CC cell;
CC nucleus;
CC cytoplasm;
CC organelle;
//
SN 10;
SD Pbr003874.1 ;
SQ MDHPTFNGVPDYMNGFSIGDLAFSPNSTQFPNLINEYQFNQLSPDPNFMGSFCQNEANKALQQNEQSVGTSNGKTRAKKNGDKKEVVDLRALLILCAQAVSADDRRTANELLKQIRQHSSPFGDGSQRLAHCFAYALEARLAGTGTQLYTALSSKRTLDADMLKAYQTYIKACPFMKAVIVIANHTISKLAEKAETLHIIDFGILYGFQWPALIHCLSRRPGGPPKLRITGIELPRSGFRPEERVQETGHRLAKYCERYNVPFEYNGIVKKWETIQYEELKVKRDEVLAVNNLFRFYNLLDETVTVNSPRDAVLNLIRGMNPEIFILSIINGSYNAPFFVTRFREALLHFSAFFDMCDTNLPREDPTRLMFEEEFLGREIVNTVACEGSERVVRPE…
CP Cytoplasmic;
MF nucleic acid binding transcription factor activity;
MF DNA binding;
BP biosynthetic process;
BP cellular nitrogen compound metabolic process;
BP anatomical structure development;
BP cell division;
BP response to stress;
BP signal transduction;
BP cell differentiation;
BP cell cycle;
BP homeostatic process;
BP symbiosis, encompassing mutualism through parasitism;
CC intracellular;
CC cell;
CC nucleus;
CC cytoplasm;
CC organelle;
//
SN 11;
SD Pbr003875.1 ;
SQ MDPSSYQLPNSNSNFIDHTLSPNFNEYPSSDPFVDLSFVDQNPSNSTLSPSLSPEGDDSDYSDSVLKYINQVLLEEDMETKPCMFHDPLAVQAAEKTLYEVLGGKFPASPDQHPVNVESPDGCSSATFSDYSGKTSSSSSSSSNSTTSHSVDSWSSSVDVIEHKPSILQNPIPENFVFQSNSMPKSQFSSKGDGLVGSYVSERMLSNLFSESEMVLQFNRGVEEASKFLPKGQLIVDLENNKPYTMADRKAENVVVKMEKDESEYFSSSLRGKKSHEREDTDLEDGRSTKQSAVYEDMADLSEIFDKVLICSEGKPDAIGCKGEQVCQDEANKALQQNEQSVGTSNGRTRAKKNGDKKEVVDLRALLILCAQAVSADDRRTASELLKQIRQHSSPF…
CP Cytoplasmic;
CP Nuclear;
MF nucleic acid binding transcription factor activity;
MF DNA binding;
BP biosynthetic process;
BP cellular nitrogen compound metabolic process;
BP response to stress;
BP signal transduction;
BP cell differentiation;
BP anatomical structure development;
BP cell division;
BP cell cycle;
BP homeostatic process;
BP symbiosis, encompassing mutualism through parasitism;
CC intracellular;
CC cell;
CC nucleus;
CC cytoplasm;
CC organelle;
//
SN 12;
SD Pbr004512.1 ;
SQ MKGEHQTHQLNQYPPPQHPDPSMASTSAGGGFGKAKMWEDESHRIDGGMDELLAVLGYKVWSSNMAEVAQKLEQLEEFMGCAQEDGLSQLASDTVHYNPADLSTWLESMISEINLPPPNFDPLMGGAVAGMQPNQQQVQLVDDPFLARGESSITTVDFPDQRKSKSISTSPPQTVFEDCNSSSSYYDFKSIPGNAVFTQTRLDSPSREPKRLKSSSGSSPSELLFNRPAASSLPQPQQPISLPATAESSPTRPALIVDSQENGVRLVHGLMACAEAVQQNNFNLAKALVTQIGYLAGSQAGAMRKVATFFAEALAQRIFQVYPQSPIDHSFSDMLQMHFYETCPYLKFAHFTANQAILESLQGKTRVHVIDFSMNQGMQWPALMQALALRPGGPPA…
CP Cytoplasmic;
CP Nuclear;
MF nucleic acid binding transcription factor activity;
MF DNA binding;
BP signal transduction;
BP biosynthetic process;
BP cellular nitrogen compound metabolic process;
BP response to stress;
BP cell differentiation;
BP anatomical structure development;
BP cell division;
BP cell cycle;
BP homeostatic process;
BP symbiosis, encompassing mutualism through parasitism;
CC intracellular;
CC cell;
CC nucleus;
CC organelle;
CC cytoplasm;
//
SN 13;
SD Pbr004607.1 ;
SQ MDPRLRAFSDSFNGVQLGNQPLPILSQPTVEAASRFDGKTCLDNNYRNFDYPQPGLTPNSVSSYSSVSPEDDSAEDCDFSDVVLKYINQMLMEEDMEEKTCMLQESLELQAAEKSFYEVLGKKYPPSPDLYRGYAGQYGESPGESSSGTWSNYITSSCNSGGYFGDNSSIQSPDGYSSQLQGLPDYSISQSFNGSSTRVSGLDGLVDAPSSSIYTPDLKTESQSVWQFRKGVEEASRFLPSETNLVVDLEANGMLVHVPNVGTGAPFVKAERKDGGEYSSGRSRGKKNLYRDDEDVEEKRSSKQAAVSSESPLRSEMFDVVLLCSTGEGRERLGSLREALQNGMSKSVQQKGQSTGSNGRKGRGKKLSVKREVVDLRTLLISCAQAAAADDHRTAN…
CP Chloroplast;
CP Nuclear;
MF nucleic acid binding transcription factor activity;
MF DNA binding;
BP biosynthetic process;
BP cellular nitrogen compound metabolic process;
BP response to stress;
BP signal transduction;
BP cell differentiation;
BP anatomical structure development;
BP cell division;
BP cell cycle;
BP homeostatic process;
BP symbiosis, encompassing mutualism through parasitism;
CC intracellular;
CC cell;
CC nucleus;
CC organelle;
CC cytoplasm;
//
SN 14;
SD Pbr005109.1 ;
SQ MEDWESVLSESPGQEQSILRLIMSDIEDPSLGLNTLLQSSSGSDHLHQDLEFSGGGFQDVVDQGGYGGGFEPNNNSGSLVSPSLHASSGPDFNFSNNASNVETRSSNVRPNHAIFSASMSNPFLVSQSSGMFQQQQSMGLDEKPQIFNPQMVINQNQAQFAQHPAMFMPLTYAQLQEHHLLSPPPSKRLNSGELGPSYPVQRVPFSNPGQELVVRAQQQLQFLPQHLQQQRPTMPVAKEKMMSPAEGCKEMMNQNQLQQQQFQQAVIDQLFNAAELIETGNSVLAQGILARLNHQLSPIGKPFSRTAFYFKEALQFLLNTNTSSNCSSALSPFSLIFKIGAYKSFSEISPVVHFANFTCNQAILEAVEGFNRVHVIDFDIGYGGQWASFMQEVALR…
CP Cytoplasmic;
CP Nuclear;
MF nucleic acid binding transcription factor activity;
MF DNA binding;
BP biosynthetic process;
BP cell differentiation;
BP cellular nitrogen compound metabolic process;
BP anatomical structure development;
BP cell division;
BP response to stress;
BP signal transduction;
CC intracellular;
CC cell;
CC nucleus;
CC organelle;
CC cytoplasm;
//
SN 15;
SD Pbr005254.1 ;
SQ MQASKEQRISGMSNRLYCQPVQEVEAYCLPRFQTLEPRLHYNESSQSTHLPLQSFHEHYCTLESSWSNGSYNVYNTPSNVSFSPSGSPMSQQDSHSYLSDQYHSPDQTYSSSISGSCITDDATDFKYKLKQLETVMLGPDSNILDNYCITFPNGASNSLPDEDSWGQIMESISKKDLKQVLIFCAKAVADNDLLMAQWMMDELRQMVSVSGEPIQRLGAYLLEGLVARKASSGSNIYKALRCKEPASCELLSYMHILYEVCPYFKFGYMSANGAIAEAMKDEDSVHIIDFQIGQGSQWVTLIQAFASRPGGPPHIRITGIDDSMSAYARGGGPNIVGKRLSKLAELFKVPFEFHAASMSGCDVQLEHLCVRPGEALAINFAFMLHHMPDESVCTQN…
CP Nuclear;
MF nucleic acid binding transcription factor activity;
MF DNA binding;
BP biosynthetic process;
BP cellular nitrogen compound metabolic process;
BP response to stress;
BP signal transduction;
BP cell differentiation;
BP anatomical structure development;
BP cell division;
BP cell cycle;
BP homeostatic process;
BP symbiosis, encompassing mutualism through parasitism;
CC intracellular;
CC cell;
CC cytoplasm;
CC nucleus;
CC organelle;
//
SN 16;
SD Pbr005472.1 ;
SQ MAYMCADSGNLMAIAQQVIQQKQQQEQQQQQRHHHHQPPLGAFSLTPWPNNNHHTLTQSPNLGFGLTGSGFSDPFQLPGSSDAGGEPGFPFPNLDHHSAGFRFSDLGGGGPAEFDSDEWMDSIIGGGDSTDSSNLPSACDTWQGSNSDFGLYGADPFRPHCPSRLSNPCSPPSDLNRVIFSETQNQLPAWTSPLPQQLHQVSVKESKSTDPQSLPNDAVGVSLRSPEIESEPPLLKALLECARIAESDPDGAVKSLVRLRESVSDHGDPTERVAFYFAEALQNRVSFLQLEKSFTTAYDTPCEDFTLSYKALNDACPYSKFAHLTANQAILEATERATKIHIVDFGIVQGVQWAALLQALATRSTGKPVSIRISGIPAPSLGDSPAASLIATGNRL…
CP Cytoplasmic;
CP Nuclear;
MF nucleic acid binding transcription factor activity;
MF DNA binding;
BP biosynthetic process;
BP cellular nitrogen compound metabolic process;
BP response to stress;
BP signal transduction;
BP cell differentiation;
BP anatomical structure development;
BP cell division;
BP symbiosis, encompassing mutualism through parasitism;
BP cell cycle;
BP homeostatic process;
CC intracellular;
CC cell;
CC nucleus;
CC organelle;
CC cytoplasm;
//
SN 17;
SD Pbr007753.1 ;
SQ MKTEVRGSITSISLQNPSTALLTTSQGTSLTGALTGCLGSLDGACIEKLLLHCASALESNDVTLAQQVMWVLNNVASSVGDPNQRLTSWILRALISRASKVCPTPMNFNGSSSTSTIPSRLMSVTELAGYVDLIPWHRFGYCASNSAIFKAIQGCPKVHILDFSITHCMQWPTLIDALAKRPEGPPLLRVTVPNWRPQVPPLLNVSSEEVGLRLANFSRFRDVPFEFNVIENSSSLELLVTTELNPSSLDLREDEVLVVNCQNWLRYLSDEPRGGIPGHQDGSMRNTFLNTIRSLNPRIIVVVDEDSDLSVPSLSSRITTCFNYLWIPFDSLETFLPKDSTQRMDYESDVGHKIENIIGFEGHQRIERLESGVTMSQRLRNIGFSSTIFCEETARE…
CP Plasmamembrane;
MF nucleic acid binding transcription factor activity;
MF DNA binding;
BP biosynthetic process;
BP cellular nitrogen compound metabolic process;
BP cell cycle;
BP homeostatic process;
BP anatomical structure development;
BP cell division;
BP signal transduction;
BP response to stress;
BP cell differentiation;
BP symbiosis, encompassing mutualism through parasitism;
CC intracellular;
CC cell;
CC nucleus;
CC organelle;
CC cytoplasm;
//
SN 18;
SD Pbr009003.1 ;
SQ MPFQFQQGKAVVEITTASLPAIFTDSSCSKYKDGGFFNHHHHSFPTGEPNSVLHMRRSPSPPTSASTLSSSFNKGGGGGDKSTSLAAETLPAVGPASSKDEWACELQSIRSGGLEAVTGSGGGVERCGLGLGGLEDWETMLSETAASPAHDQSLLRWIAGDVDDMSCGLKQLLQSGNGNHHNSPIDFDGNAGLGIVDQGPNFDLIGSSGVSVPNFGFAGSGFSNGGNNGSNGKVGFVPHRSGSFGLLNYKVSNVGLMYNNGGTNSVNCNIQNPIFSNSSNTVALPVSLPAVYGQQQFESSPDEKPQILNPQLFMSNQTQQPQNPSFFMPLAYAQQEQYHLLQSQPKRHNSGSNVNLSTHQIQKGQFSDPRHDIFVRHQQQQQLGFAQGMQFLPQQH…
CP Cytoplasmic;
CP Nuclear;
MF nucleic acid binding transcription factor activity;
MF DNA binding;
BP biosynthetic process;
BP cell differentiation;
BP cellular nitrogen compound metabolic process;
BP anatomical structure development;
BP cell division;
BP response to stress;
BP signal transduction;
BP symbiosis, encompassing mutualism through parasitism;
BP cell cycle;
BP homeostatic process;
CC intracellular;
CC cell;
CC nucleus;
CC organelle;
CC cytoplasm;
//
SN 19;
SD Pbr009709.1 ;
SQ MAQEDGSPVTSSPLQFFPWLSPGMGSPYSPWLRELKSEERGLCLIQLLYACASHVTSGSIEKANFWLDQISQLASPDGDSMQRIAAYFTEALANRMLKCWPGLHKALHSTKISSVSEEIIVQRLFFDLCPFLKVAYVVTNQAIVEAMEGEKMVHIIDLHSCEPAQWINLIQTLNARPEGPPHLRITGINEQKEVLDQMFLQLTEEAGNLNIPFQFNAIVSKLENLDIESLRVKTGEALAICSVLQLHSFLASDDDQRRKSPLASKNLQKVLHMNKLTLGEWLEKDPISAYNLSPDTAWSPLSGASPTGSFLTSLWGLSPKLMVITEQEANHNGHTLMDRIMEALHFYGALFDCLESTVSRAPMERQKVEKMLFGEEIKNIIACEGTERRERHEKLE…
CP Cytoplasmic;
MF nucleic acid binding transcription factor activity;
MF DNA binding;
BP biosynthetic process;
BP cellular nitrogen compound metabolic process;
BP response to stress;
BP signal transduction;
BP cell differentiation;
BP anatomical structure development;
BP cell division;
BP cell cycle;
BP homeostatic process;
BP symbiosis, encompassing mutualism through parasitism;
CC intracellular;
CC cell;
CC nucleus;
CC organelle;
CC cytoplasm;
//
SN 20;
SD Pbr010041.1 ;
SQ MSLVRPAELSTSYRNPNFYSLKGSNESSSLSAQIFGSDKPKVVYSDDPYSTESYEKYFLDSPMEEVTHPSSSGVSGSSTNPQGASSYQLTAGSVSSLNTQNPFSTSLMSNFESDYFESQSPDADSFDEDKMRLKLQELERALLNDNADEDDGERNCSSQSMEVDGEWIDPIQNELLHDSPKESSSSDSNASSTSSNKGISQVSPRTPKQLLFECAGALSEGYVEEASTMINELRQMVSIQGDPTQRIAAYMVEGLAARVASSGKFLYKSLKCKEPPSSYRLAAMQILFEVCPCFKFGFMAANGAIIEACKDEKRVHIIDFDINQGNQYITLIQTLSSLPGKPPHLKLTGVDDPETVQRHVGGLKIIGQRLEKLAEALKVPFEFHAVASRTSIVNTS…
CP Nuclear;
MF nucleic acid binding transcription factor activity;
MF DNA binding;
BP biosynthetic process;
BP cellular nitrogen compound metabolic process;
BP response to stress;
BP signal transduction;
BP cell differentiation;
BP anatomical structure development;
BP cell division;
BP cell cycle;
BP homeostatic process;
BP symbiosis, encompassing mutualism through parasitism;
CC intracellular;
CC cell;
CC nucleus;
CC organelle;
CC cytoplasm;
//
SN 21;
SD Pbr010433.1 ;
SQ MDISLFSPNKEANFLQQYSNQIKINGLAAAIDMQSTNQQTQNSHTSTSRSSGSSEPCPAGTKWASRLLMECARAVSEKDSSKINHLLWMLNELASPYGDFEQKLASYFLQALFCKATDSGLRCYKTLTSVAEKSHSFDSARKLILKFQELSPWTTFGHVASNGAILEALEGETKLHIIDISNTLCTQWPTLLEALATRNDETPHLKLTVVVTASIVKSLMKEIGQRMEKFARLMGVPFEIKVISGLNNLGQLTKEDLGVHEDEAIAVNCIGALRRVEVAERGAVIRMFQSLRPRVVTVVEEEADLFSSSVNDDFVKYFEECLRFYTLYFDMLEESFVPTSNDRLMLERECMRSIIRVLGCDHHDHDDHKNGGECERREXXXXRGNQWSDRLKAAFS…
CP Cytoplasmic;
CP Chloroplast;
MF nucleic acid binding transcription factor activity;
MF DNA binding;
BP cell cycle;
BP biosynthetic process;
BP cellular nitrogen compound metabolic process;
BP homeostatic process;
BP anatomical structure development;
BP cell division;
BP response to stress;
BP signal transduction;
BP cell differentiation;
BP symbiosis, encompassing mutualism through parasitism;
CC intracellular;
CC cell;
CC nucleus;
CC cytoplasm;
CC organelle;
//
SN 22;
SD Pbr010864.1 ;
SQ MQSGGFNGGGGGGGVPDFYTNGRSISISAAMNGHNPSQNNPYHRSQLPSMFMDPTASQIARQTQFQPQTQNPAAGLIGKRTLAEFQAHQQNHYNPHQNYHQNPGQNLYLRSLKPRTFQHSSPISPLSPIDFSSGSAITGSDSSSSSSSILSHQRFGLPLLHQLRPQPINQTAPPAMSYVNNLVPNNPVQNNPVQTRGLDSEKKMISNTLQELEKQLLDDNDEDDEGDAVSVITKTNSEWSETIQNLMGSAAPSQCQKPISPSPTSSSSSSSSVASPASSTCSKQSLMEAATAISEGKSEAAAEILARMMATQVPNPRPNSEQRLLEFLGLALKSRVNPIDNSPPANELFGQEHSGSIQLLYELSPCFKLGFMAANSAILEATLTDQSATNKVHVID…
CP Nuclear;
MF nucleic acid binding transcription factor activity;
MF DNA binding;
BP biosynthetic process;
BP cellular nitrogen compound metabolic process;
BP signal transduction;
BP response to stress;
BP cell differentiation;
BP anatomical structure development;
BP cell division;
BP cell cycle;
BP homeostatic process;
BP symbiosis, encompassing mutualism through parasitism;
CC intracellular;
CC cell;
CC nucleus;
CC cytoplasm;
CC organelle;
//
SN 23;
SD Pbr011071.1 ;
SQ MAHGTVNIIQSHESWINYPNSNVTGFENNPISNPKPVENRFINLERSELSQWVEHITKQLIDDLPEPATTNTASADMLQTSEDYFVPSSLSADLISPTKVPRRSYGEHEHHELQWGNELQLHADNNDVRARGGNNMSKLDEHGLTLITLLFECAVAISVDNLPEAHRMLLELTHMASPYGPSCAERVVAYFSKAMASRVVNSWLGNCSPLVNYKSVHSAFQVFNTISPFVKFAHFTSNQAILEAFHHRDRVHILDLDIMQGLQWPALFHILATRMEGPPHLRMTGVGTSSEILLETGKQLSNFAKRLGLSFEFFPIVRTVGEVDASMVQVEQGETLAVHWLQHSLYDATGSDWKTLRLIEELAPRIVTLVEQDMSHSGSFLDRFVGSLHYYSTMFD…
CP Plasmamembrane;
CP Cytoplasmic;
MF nucleic acid binding transcription factor activity;
MF DNA binding;
BP biosynthetic process;
BP cellular nitrogen compound metabolic process;
BP anatomical structure development;
BP cell division;
BP response to stress;
BP signal transduction;
BP cell differentiation;
BP symbiosis, encompassing mutualism through parasitism;
BP cell cycle;
BP homeostatic process;
CC intracellular;
CC cell;
CC nucleus;
CC organelle;
CC cytoplasm;
//
SN 24;
SD Pbr011959.1 ;
SQ MTNAMFSFGDFNFGGVHDIFSSTEKGFDGMEAENNVGKQVNLFGAEEWGKLGEFGSVDSDHGFYGNDYSSGGNLFPKYQQEEQQQPLISYYGLYDAMQVDPLSMPFQACLGKIAKLEDIPNLVPHVEPKKEKRDPFSSLAGLDLLNSYGSGFKRLNGERNFESSNYNACTDQVATGRKLSTEEIMRVAGARFIQTYSQVSDVPSMLSHPFGSSFSGLSYEEARDVELVEFLLVSAEKVGYQQYERAGNLLKRCDSRSSSTGNPVERVVHFFSEALREKIDRETGRVAPKVLGNKQSFNVDRAMKIPNDTTLACQIKLPFGQVVQFAGIQAIVENVAEAKKVHVIDLEIRNGVQWTGLMQALASRCDCLLELLKITAVGTTCRESVEETGKRLGSFA…
CP Cytoplasmic;
MF nucleic acid binding transcription factor activity;
MF DNA binding;
BP response to stress;
BP signal transduction;
BP biosynthetic process;
BP cell differentiation;
BP cellular nitrogen compound metabolic process;
BP anatomical structure development;
BP cell division;
BP symbiosis, encompassing mutualism through parasitism;
BP cell cycle;
BP homeostatic process;
CC intracellular;
CC cell;
CC nucleus;
CC organelle;
CC cytoplasm;
//
SN 25;
SD Pbr011960.1 ;
SQ MSCASGLSTVEVMRVARERFIQFSSRRYADDCMADHVLGSTAFGLSDQETKDVGLAHLLLACAEKVAKKQYGCAKKLQNLCDFLSSSSGNSVQRVVYYFSKALQQKTDRETGRNTSQGSESRDVAAVHVEEAMAALSPALMACFLEVPFFQVTEFAGIQAIVENVASSKKIHFVDLAIRTGGHCIVLMQALATRYECPIEMLKVTAVGVKSGKKIEDTGRRLAQFAEALKLPFTFKIAMVKDIKDIKEGIFELDTGEAVAVYCPLLLSSTMNQPNCLESLMKALRSLNPRLMVVNEVEANHNSPIFINRFYKALFYYSAYFECLDACMDRGSALRMELEETYLSHEIKNIVASEGEERVNRRMKIDGWRSLFGKCGMVEAELSLSSLYQADLIAKQ…
CP Plasmamembrane;
CP Chloroplast;
MF nucleic acid binding transcription factor activity;
MF DNA binding;
BP response to stress;
BP signal transduction;
BP biosynthetic process;
BP cellular nitrogen compound metabolic process;
BP cell differentiation;
BP anatomical structure development;
BP cell division;
BP cell cycle;
BP homeostatic process;
CC intracellular;
CC cell;
CC nucleus;
CC organelle;
CC cytoplasm;
//
SN 26;
SD Pbr012085.1 ;
SQ MKGEHQTHQLNQYPPPQHPDPSMASTSAGGGFGKAKMWEDESHRIDGGMDELLAVLGYKVRSSDMAEVAQKLEQLEEFMGCAQEDGLSQLASDTVHYNPADLSTWLESMISEINLPPPNFDPLMGGAVAGMQPNQQQVQLVDDPFLARGESSITTVDFPDQRKSKSISTSPPQTVFEDCNSSSSYYDFKSIPGNAVFTQTRLDSPSREPKRLKSSSGSSPSELLFNRPAASSLPQPQQPISLPATAESSPTRPALIVDSQENGVRLVHGLMACAEAVQQNNFNLAKALVTQIGYLAGSQAGAMRKVATFFAEALAQRIFQVYPQSPIDHSFSDMLQMHFYETCPYLKFAHFTANQAILESLQGKTRVHVIDFSMNQGMQWPALMQALALRPGGPPA…
CP Cytoplasmic;
CP Nuclear;
MF nucleic acid binding transcription factor activity;
MF DNA binding;
BP signal transduction;
BP biosynthetic process;
BP cellular nitrogen compound metabolic process;
BP response to stress;
BP cell differentiation;
BP anatomical structure development;
BP cell division;
BP cell cycle;
BP homeostatic process;
BP symbiosis, encompassing mutualism through parasitism;
CC intracellular;
CC cell;
CC nucleus;
CC organelle;
CC cytoplasm;
//
SN 27;
SD Pbr013644.1 ;
SQ MEDGSSAATAWIDGIIKDLIHSSTNVSIPQLIHNVREIIFPCNPSLAALLEYRLRSISEPPPPPLPLPVPSFNPTPIPDMRSRQQGGPGPGALKLNLDSGALHDVAIFNTSTADNNDLYLQSWSGGGGGVGLSLPQPNPTHVPMTCNQTNPHHQSPSFNQAIHQTQDKQLENSSSSSPAAESTTPTAAPAPTTATATAPPQPTTSAVSLLREKKEEMRQQKRDEEGLHLLTLLLQCAEAVSADNYDEATKMLLEISELSTPFGTSAQRVAAYFSEAMSARLVSSCLGIYASLPHSSVPVTYTQKMVSAFQVFNGISPFVKFSHFTANQAIQEAFEREDRVHIVDLDIMQGLQWPGLFHILASRPGGPPYVRLTGLGTSMVALEATGKRLSDFADKL…
CP Plasmamembrane;
CP Nuclear;
MF nucleic acid binding transcription factor activity;
MF DNA binding;
BP biosynthetic process;
BP cellular nitrogen compound metabolic process;
BP anatomical structure development;
BP cell division;
BP signal transduction;
BP response to stress;
BP cell differentiation;
BP cell cycle;
BP homeostatic process;
BP symbiosis, encompassing mutualism through parasitism;
CC intracellular;
CC cell;
CC nucleus;
CC organelle;
CC cytoplasm;
//
SN 28;
SD Pbr014064.1 ;
SQ MGPYGSTTCSGVSSSASSSSSSSVTKSPAEIDGYLADAGYKVRASDLRHVAQRLEHLETVMVNSPSDLSQLASDAVLYNPSDIATWVDSLLSEFNPQPLISLPSDLDFPDGAVINNPAALAGETWTDNSSVISAVPQQNHQLTVVTAMEEDSGIRLVHLLVTCAESVQRGELTLAGSLIETMQALMTRVNTSCGIGKNELLYHYFYEACPYLKFAHFTANQAILEAFHGHDCVHVIDFNLMHGLQWPALIQALALRPGGPPLLRLTGIGPPSPDGRDSLREIGLRLAELARSVNVRFAFRGVAASRLEDVKPWMLQVSPKEAVAVNSIMQLHRLLGSDPNRNSPIEMMLSWIRNLNPKIVTVVEQEADHNKPGFLDRFTEALYYYSTMFDSLEACA…
CP Plasmamembrane;
CP Cytoplasmic;
MF nucleic acid binding transcription factor activity;
MF DNA binding;
BP response to stress;
BP signal transduction;
BP biosynthetic process;
BP cellular nitrogen compound metabolic process;
BP cell differentiation;
BP anatomical structure development;
BP cell division;
BP symbiosis, encompassing mutualism through parasitism;
BP cell cycle;
BP homeostatic process;
CC intracellular;
CC cell;
CC nucleus;
CC organelle;
CC cytoplasm;
//
SN 29;
SD Pbr014306.1 ;
SQ MAYMCADSGNLMAIAQQVIQQKQQQEQQQPQQHHQQPPLGAFSLTPWPNNTHHTLAQSPNLGFGLTGSGFSDPFQMPGGSDAGGEPGFPFPNLDHHAAGFRFSDLGGGGAAEFDSDEWMDSIIGGGDSTDSSNMPYACDTWQGNNADFGLYGADPFQPHCPSRLSNTCSPPSDLNRVVFSETQNQLPTWTPPPPQQLHQVSIKESKSADHPSLKNDAVGVSLGSPEIESAPPLLKALLDCARLTESDTDRAVKSLIRLRESISDHGDPTERVAFYFAEALHSRVSVLQSEKNFTTAYDTPCEDFTLSYKALNDACPYSKFAHLTANQAILEATERATKIHIVDFGIVQGVQWAALLQALATRSTGKPVSIRISGIPAPSLGDSPAASLFATGNRLR…
CP Cytoplasmic;
CP Nuclear;
MF nucleic acid binding transcription factor activity;
MF DNA binding;
BP biosynthetic process;
BP cellular nitrogen compound metabolic process;
BP response to stress;
BP signal transduction;
BP cell differentiation;
BP anatomical structure development;
BP cell division;
BP symbiosis, encompassing mutualism through parasitism;
BP cell cycle;
BP homeostatic process;
CC intracellular;
CC cell;
CC nucleus;
CC organelle;
CC cytoplasm;
//
SN 30;
SD Pbr016067.1 ;
SQ MACAEAVQLNNFNLAKALVTQIGYLVESTHSRRSTTHSPTCCRCTSRRPMVVNSVFELHKLLGRPGVIEYVLLVVKQMKLEIVTVVEQEANHNGAAADEGLDVGD;
CP Extracellular;
CP Chloroplast;
MF nucleic acid binding transcription factor activity;
BP response to stress;
BP signal transduction;
BP biosynthetic process;
BP cellular nitrogen compound metabolic process;
BP transport;
BP reproduction;
BP cell differentiation;
BP anatomical structure development;
CC intracellular;
CC cell;
CC nucleus;
CC organelle;
//
SN 31;
SD Pbr016671.1 ;
SQ MKREHCHSSATASQNNSKPEYSSPPSSALNGKAKIWVDEQGYSGSGGMDELLAVLGYKVRTDDMADVAEKLEQLEMVMGSAQEDGISQLSDTVHYNPSDLSGWVQSMLSELNTGDDMPSINGPLLAPGESSTRTSTKFCNSQRTRVFNDDSEYDLRAIPGVAAYPPAHSSSETESTRKRLKTSIGSNSGGIEVSGAVSDPTRPLVLVDSQETGVQLVHTLMACAEAVQQENLKVADALVKHVGLLAAAQTGAMRKVATYFAEALARRIYRIYPQDCLDSSYSDILQMHFYETCPYLKFAHFTANQAILEAFATATRVHVIDFGLKQGMQWPALMQALALRPGGPPAFRLTGIGPPQPDNTDALQQVGWKLAQLAETIGVEFEFRGFVASSLADLEP…
CP Cytoplasmic;
MF nucleic acid binding transcription factor activity;
MF DNA binding;
BP signal transduction;
BP biosynthetic process;
BP cellular nitrogen compound metabolic process;
BP response to stress;
BP cell differentiation;
BP anatomical structure development;
BP cell division;
BP cell cycle;
BP homeostatic process;
BP symbiosis, encompassing mutualism through parasitism;
CC intracellular;
CC cell;
CC nucleus;
CC organelle;
CC cytoplasm;
//
SN 32;
SD Pbr016997.1 ;
SQ MLLTLFSAEGYRVEENQGCLTLGWHNRPLIAASGWQVMSMPEATTNQEAVGIINQNNNPNHI;
CP Extracellular;
CP Nuclear;
MF nucleic acid binding transcription factor activity;
BP transport;
BP response to stress;
BP signal transduction;
BP biosynthetic process;
BP cellular nitrogen compound metabolic process;
BP reproduction;
BP cell differentiation;
BP anatomical structure development;
BP anatomical structure formation involved in morphogenesis;
CC intracellular;
CC cell;
CC nucleus;
CC organelle;
//
SN 33;
SD Pbr017150.1 ;
SQ MKAMPLPFEEFQGKGVLDFSSVSSSSAAAAASDSFLSSPPQKWVHRHHSSKENCYVGSTEPTSVLDTRRSPSPPTSSSTLSSSHGSGASGGSTDTTTAAGVENPSQTPLEEQKCGPSLGMEDWESVLSESPGQEQSILRLIMSDIEDPSLGLNTLLQSSSGSDHHHQNLEFGCGGFQDVVDQGGGYGGGFEADDHSGVLVSPSLHASSDPDFNFSNNASNVETQSSNVRPNPTMFSASMSNPFPVSLSSGMFQRQQNMGLEEKPQIFNPQMVINQNQAQSTQNPAMFMPLTYAQLQEHHLLSPPPSKRLNSGGFGPGYPVQRVPFLNPGQELLVRAQQQQQQLQFLPQHLQQQRPTMPVAKEKMMSPAEGGKEMMNQNHQQQQLQQAVIDQLFNAA…
CP Nuclear;
MF nucleic acid binding transcription factor activity;
MF DNA binding;
BP biosynthetic process;
BP cell differentiation;
BP cellular nitrogen compound metabolic process;
BP anatomical structure development;
BP cell division;
BP response to stress;
BP signal transduction;
CC intracellular;
CC cell;
CC nucleus;
CC organelle;
CC cytoplasm;
//
SN 34;
SD Pbr017263.1 ;
SQ MRVPVSSPLSNNDNQSPKHNPQSNNPSVNFHLGISSLGGYEPTSVLDLRQSPSPVSAEKPSKISGISNVLSHSNHDPLEWEDEQVLHNLDWDSIMRDLGLHDDNVPNLKTSIPQLNANDPQISEYPHPQQFDPTQLVHSDYDINLSEVYSSQNCYDHVTNDFHPSGNWNVGLDFIEELIRAADCFDTEELQLAQSLLNGSDTAAREFTSWADIVQTIRAHKGFSGISPVPMFSHFTTNQALLEALNGSAFIHVIDFDIGLGGQYASLMKELAEKADVASRNNGNPVPPVLRITAVVPEEYAVETRLIRENLSQFAQELKIRFQVEFVPLRTFDMMSFKAVKFMDGEKTAVLLSPYILRRLSSQNNISGFLGNMRRVSPSVVVFVDGEGMGDAGTTS…
CP Cytoplasmic;
CP Nuclear;
MF nucleic acid binding transcription factor activity;
MF DNA binding;
MF signal transducer activity;
BP biosynthetic process;
BP cell differentiation;
BP cellular nitrogen compound metabolic process;
BP anatomical structure development;
BP cell division;
BP signal transduction;
BP response to stress;
BP anatomical structure formation involved in morphogenesis;
CC intracellular;
CC cell;
CC nucleus;
CC organelle;
CC cytoplasm;
//
SN 35;
SD Pbr017325.1 ;
SQ MGSFNSSHIQQQQQEDHLNHPNNNNISDLQLYHHHLHHHHISDQPPLIMSTSPSISPTHLRHLLITCAELISHLDFPSAHRLISLLSSNSSPFGDSTERLTHHFVKALCFRLNINPNYSPTTIGPLTALTNAASASASSSSNYLFLPVLQEEEDNNEEALHSCYLTLNQITPFIRFSHLTANQAILEAIDASHLSIHILDFDIMHGVQWPPLMQALVERSYNSPLHPPPTLRITATGRDLTLLLRTGERLLRFAQSLGLAFQFHPLVLNNTSQPSDLISPSTLGLHQNEVLAVNCVLYLHTLVTDDSRDLFLFLQKIKSLNPKVFTIANKEANHNNHLFFNRFVEALDHYGAVFDSLEATLPPNSRERLVVEEWFGREIKDVVGIEGEKRKQRHES…
CP Plasmamembrane;
CP Nuclear;
MF nucleic acid binding transcription factor activity;
MF DNA binding;
BP biosynthetic process;
BP cellular nitrogen compound metabolic process;
BP anatomical structure development;
BP response to stress;
BP signal transduction;
BP cell differentiation;
BP cell division;
BP symbiosis, encompassing mutualism through parasitism;
BP cell cycle;
BP homeostatic process;
CC intracellular;
CC cell;
CC nucleus;
CC organelle;
CC cytoplasm;
//
SN 36;
SD Pbr017879.1 ;
SQ MLQSLVPQSPIAAATPSNNNPTSSSSSMKTKRVDRDLAGSGSGDSDAEDPSFTKRPNSGRNFRESTADDRDTEPVAEGESDGLRLLGLLLQCAEFVAMDSLDDASDLLPEIAELSSPFGSSPERVGAYFSHALQTRVISSCLGTYSPLANKTLTLAQSQRIFNGLQSYNSISPLVKFSHFTSNQAIFQALDGEDHVHVIDLDIMQGLQWPGLFHILASRSKKIRSMRITGFGSSSELLQSTGRRLADFASSLGLPFEFQPLEGKIGSITDLSQLGIRPSEATVVHWMHHCLYDVTGSDLATLRLLGSLRPKLIMIAEQDLSHSGSFLSRFVEALHYYSALFDALGDGLGADSLERHMVEQQLFGCEIRNILAVGGPKRTGEVKVERWGDELKRVGF…
CP Plasmamembrane;
CP Nuclear;
MF nucleic acid binding transcription factor activity;
MF DNA binding;
BP biosynthetic process;
BP cellular nitrogen compound metabolic process;
BP anatomical structure development;
BP cell division;
BP response to stress;
BP signal transduction;
BP cell differentiation;
BP symbiosis, encompassing mutualism through parasitism;
BP cell cycle;
BP homeostatic process;
CC intracellular;
CC cell;
CC nucleus;
CC organelle;
CC cytoplasm;
//
SN 37;
SD Pbr018056.1 ;
SQ MKTEVRGSITSVSLQNPSTALFTTSQGKSLTGALTGCLGSLDGACIEKLLLHCASALESNDVTLAQQVMWVLNNVASSVGDPNQRLTSWILRALISRASKVFPTSWILRALISRASKVFPTPMNFNGSSSTSTIPSRLMSVTELAGYVDLIPWHRFGYCASNSAICKAIEGCPKVHILDFSITHCMQWPTLIDALEKRPEGPPLLRITVPHWRPQVPPLLNVSSEEVGLRLGNFSRFRNVPFEFNVIENSSSLELLLGTQLNPSSLGLREDEVLVVNCQNWLRYLSNEPLGGIPGHQDGSMRNTFLNTIRSLNPRIIVVVDEDSDLTAPSLSSRITTCFNYLWIPFDSLETFLPKDSTQRMNYESDVGHKIENIIGFKGQQRIERLESGVTMSQRL…
CP Plasmamembrane;
MF nucleic acid binding transcription factor activity;
MF DNA binding;
BP biosynthetic process;
BP cellular nitrogen compound metabolic process;
BP cell cycle;
BP homeostatic process;
BP anatomical structure development;
BP cell division;
BP response to stress;
BP signal transduction;
BP symbiosis, encompassing mutualism through parasitism;
CC intracellular;
CC cell;
CC nucleus;
CC organelle;
CC cytoplasm;
//
SN 38;
SD Pbr018237.1 ;
SQ MEDIDEEEELLNLSLAIVTSSGRERFRKRKRSRDDGVVNSSVRPLNSYEGCEGKIFRLLQMREQMLKNLDHHKKKGVDVDDEDGKGLHLIHMLLITATAVNENNVGSALEHLTELYKSVSLSGDSIQRVVAYFADSLAARLLTRRSPFYDIIMKEPTSEEEFVAFTALYRVSPYYQFAHFTAIQAIIEAFEKEEEKNNRALHVIDFDVSYGFQWASLIQSLSEKASSRKRISLRITGFGRSVDELRETENRLTSFSKGFQNLAFEFQGLLRGSKLVNLRKKRNETLAVNLDFHLNTLSNNLKISDLLKSVHLLNPSIVILVEQEGTSSPRRFLSRFMESLHYFAAMFDSLDECLPLKSAERLSIEKNHLGKEIKSMLNYDNNNDDNCPKIEKMETW…
CP Nuclear;
MF nucleic acid binding transcription factor activity;
MF DNA binding;
BP biosynthetic process;
BP cellular nitrogen compound metabolic process;
BP response to stress;
BP signal transduction;
BP cell differentiation;
BP anatomical structure development;
BP cell division;
BP symbiosis, encompassing mutualism through parasitism;
BP cell cycle;
BP homeostatic process;
CC intracellular;
CC cell;
CC nucleus;
CC organelle;
CC cytoplasm;
//
SN 39;
SD Pbr018291.1 ;
SQ MTTEQPEPNSTSDHILDWLEDSVTFFPSFWDDPYHSNDIDGGLQWWDENHDLVHPTTNPTCLNNPTGISIPTTTTGPPNPANLNHPSPTDSSKKRKASPEEQQIDRKNHHGXXXXXXXXXXXXXXXXXXXXXXXXXTAVRSILPSRGTNQVKSKEGRWAEQLLNPCASAITGGNSTRVQHLLFVLHELASVTGDANHRLAAHGLHALNQHLSSSSSSAPNGSASAAPVTFTSTEPRFFQKSLMKFYEVSPWFAFPNNIANSSILQLIAEEFDRTRTLHIVDVGVSHGMQWPTLLEALTHRPGGPPPLVKITVIAGAENNQNRGTPFAVGPPGDNFSNGLLSFAKYMNINLQIKRLDDQPLKTLNAQLIDASNDETLIVCVQFRLHQLNHNTPDERT…
CP Cytoplasmic;
CP Nuclear;
MF nucleic acid binding transcription factor activity;
MF DNA binding;
BP biosynthetic process;
BP cellular nitrogen compound metabolic process;
BP symbiosis, encompassing mutualism through parasitism;
BP cell cycle;
BP homeostatic process;
BP anatomical structure development;
BP cell division;
BP response to stress;
BP signal transduction;
BP cell differentiation;
CC intracellular;
CC cell;
CC nucleus;
CC organelle;
CC cytoplasm;
//
SN 40;
SD Pbr018479.1 ;
SQ MEDWESVLSESPGQEQSILRLIMSDIEDPSLGLNTLLQSSSGSDHLHQDLEFSGGGFQDGVDQGGYGGVFEPNNNSGSLVSPSLHASSGPDFNFSNNASNVETRSSNVRPNPAIFSASMSNPFLVSQSSGMFQQQQSMGLDEKPQIFNPQMVINQNQAQFAQYPAMFMPLTYAQLQEHHLLSPPPSKRLNSGELGPSYPVQSVPFSNPGQELVVRAQQQLQFLPQHLQQQRPTMPVAKEKMMSPAEGCKEMMNQNQLQQQQFQQAVIDQLFNAAELIETGNSVLAQGILARLNHQLSPIGKPFSRTAFYFKEALQFLLNTNTSSNCSSALSPFSLIFKIGAYKSFSEISPVVQFANFTCNQAILEAVEGFNRVHVIDFDIGYGGQWASFMQEVALR…
CP Nuclear;
MF nucleic acid binding transcription factor activity;
MF DNA binding;
BP biosynthetic process;
BP cell differentiation;
BP cellular nitrogen compound metabolic process;
BP anatomical structure development;
BP cell division;
BP response to stress;
BP signal transduction;
BP symbiosis, encompassing mutualism through parasitism;
CC intracellular;
CC cell;
CC nucleus;
CC organelle;
CC cytoplasm;
//
SN 41;
SD Pbr018647.1 ;
SQ MQSGGYNGGRGSGVPDFYPNGRSISIAAAMNGHNPSQNNPFHRSQLPGLFLDPTASHIARQTQFQPQTQNPAAGLIGKRTLAEFQAQQQNHYNPHQNPSQNLYLRSLKARSFQHSSPISPLSPIDFSSGSSLSGSESSFSSTSILPHQRFGLPMLQQLRPQPINQPAPQAMSYVNNLVPNNPVQTRGVDSEKMFSNRLQELEKQLLDDNDEDDEGDAVSVITKTNSEWSETIQNLMGTAAPSQNQKPVSPSPTSSSSSSSSVASPATSTCSKQSLMEAATAISDGKSEAAMEILTRMNSTQVANPRPSSEQRLLEFMGLALKSRVNPIDNPAPIAELFRQEHTGSTQSLYELSPCFRLGFMAANLAIVEATMTDQSATSKVHVIDFDIGQGGQYVL…
CP Nuclear;
MF nucleic acid binding transcription factor activity;
MF DNA binding;
BP biosynthetic process;
BP cellular nitrogen compound metabolic process;
BP response to stress;
BP signal transduction;
BP cell differentiation;
BP anatomical structure development;
BP cell division;
BP cell cycle;
BP homeostatic process;
BP symbiosis, encompassing mutualism through parasitism;
CC intracellular;
CC cell;
CC nucleus;
CC cytoplasm;
CC organelle;
//
SN 42;
SD Pbr018916.1 ;
SQ MDPSSYQLPDSNSNFIDQTLSPNFNEYPSSDPFVDLSFLCQNPSNSALSPSLSPEGDDGDYSDSVLRYINQVLMEEDMETKPCMFHDPLAVQAAEKSLFEVLGGKFPPSPNQHPHNFESPYGRSSATFSDHSGNNSSVLSSSTSYWDDSRSSVDVIEHKPSILQNPIPENFVFQSKAKSQFLSNGNGLVGSYVSDPMVSNLFGENELVLQFNRGVEEARKFLPRGQLIVDVENNKPYTVANGKAENVVVKTEKDEGEYFPTSSRGKKSHEREDADLEVGRSTKQSAVYEDTEADLSEIFDKVLLCGGGESKPIVSEGEEVCLDEANKALQQNGQSVGTSNGKTRAKKKGDKKEVIDLRTLLISCAQAVSSDDRRTANELLKQIRQHSSAFGDSSQR…
CP Cytoplasmic;
CP Nuclear;
MF nucleic acid binding transcription factor activity;
MF DNA binding;
BP biosynthetic process;
BP cellular nitrogen compound metabolic process;
BP response to stress;
BP signal transduction;
BP anatomical structure development;
BP cell division;
BP cell differentiation;
BP cell cycle;
BP homeostatic process;
BP symbiosis, encompassing mutualism through parasitism;
CC intracellular;
CC cell;
CC nucleus;
CC cytoplasm;
CC organelle;
//
SN 43;
SD Pbr018917.1 ;
SQ MDHPTFNGSPDYMNGFSIDDLAFSPNSTQFSNLTNEYQFNQFSPDLNFMDNHFSLPPDFEQGNIVPKVSLTTSGESSVPSNSLSPPDGGSLSLPTAVSVGGVDSSSDDNDFSEAVFKYVNQILLEENIEKKPGMFFDPLGLRVTEKSFYDVLGQQYPFSPNQQPLHINPNVESPDGNNSGSCGDCSGSNNSPSPGTSNSIDPQRVGDSGDQKSSFPETTLPNDNPFQFTSHSSSQLSVPLENRMTSVGDGQHVGGGQRLDDMLQGSSVEEFVAQNIYTDSDSILQFQRGLEEASKFLPKSTQLLVDLEINTVSPEVKASVPMVTVQKEKSERKNSPNGSKGRKNREWEDVDLEEGRSSKQSAVYIEKTEESELSEMFDKVLLSTGGNNEFQCDNVA…
CP Nuclear;
MF nucleic acid binding transcription factor activity;
MF DNA binding;
BP biosynthetic process;
BP cellular nitrogen compound metabolic process;
BP response to stress;
BP signal transduction;
BP cell differentiation;
BP anatomical structure development;
BP cell division;
BP cell cycle;
BP homeostatic process;
BP symbiosis, encompassing mutualism through parasitism;
CC intracellular;
CC cell;
CC nucleus;
CC cytoplasm;
CC organelle;
//
SN 44;
SD Pbr018918.1 ;
SQ MDHPTVNGSPDYLNGFSIDDLAFSPDLTQFSNLTNEYQFNQFSPDLNFMDNQFSLPPDFEQGNIVPEVSLTTSGESFVPSKSLSPPDGGSLSLPTTVSVGGADSSSDDSDFSEAIFKYANQILLEENIEKKPCMFFDPLGLRVTEKSFYDVLGQQYPFSPNQQPLHINPNVESPDGNISGNCSDCSGSNRSSSPGTSNSIDPQWVGDSGEQKPSFPQTSLPNDSPFQFNSHSSSQLSVPLENRMTSVGDGQHVGDMLQGSSAEEFVAQNIFTDSDSILQFQRGLEEASKFLPKSTQLLVDLESNTVSPEVKANVPIVTVKKEKSERKNSPNGSKGRKNREREDVDLEEGRSSKQSAVYIEKTEESELSEMFDKVLLSTGGNNESQCDSVAFKNEAS…
CP Cytoplasmic;
CP Nuclear;
MF nucleic acid binding transcription factor activity;
MF DNA binding;
BP biosynthetic process;
BP cellular nitrogen compound metabolic process;
BP response to stress;
BP signal transduction;
BP cell differentiation;
BP anatomical structure development;
BP cell division;
BP cell cycle;
BP homeostatic process;
BP symbiosis, encompassing mutualism through parasitism;
CC intracellular;
CC cell;
CC nucleus;
CC cytoplasm;
CC organelle;
//
SN 45;
SD Pbr018920.1 ;
SQ MDTLLERYDVSVERLNFGSVYPHQNLVNGFKVNHESTNSIFPPTNLDHNSSDSSTYSSTGSDGDSIDPNDFNHPMLKYISDILLEEDLEGKPCMMQGCLALQAAEKSFFDVLNPKGPPSPNQPPLSHSLENSDDDSTPSFHSGNGSSIAAKTDWGFDSSETSHFQSSLVESQSDNLLVSDLLSELQSSGHFGGVGEASKFLPNGSFGTFDQERNHLMHPGPDLRPPGTRTLVRRPENYGYNSTNILKGKKNHQREDVDYPEEGRSSKLPVAFADDSEPPQEMFDEVLLCHGHHRLGNKQAKGAKTTRSKKQNNNTEMVDLRTLLTQCAQAVANYDQRTASELLQKIRHHSSPCGDANQRLAHYFADGLEARLAGATTPTYSFLVGTQTSTADILKA…
CP Nuclear;
MF nucleic acid binding transcription factor activity;
MF DNA binding;
BP biosynthetic process;
BP cellular nitrogen compound metabolic process;
BP response to stress;
BP signal transduction;
BP cell differentiation;
BP anatomical structure development;
BP cell division;
BP symbiosis, encompassing mutualism through parasitism;
BP cell cycle;
BP homeostatic process;
CC intracellular;
CC cell;
CC nucleus;
CC cytoplasm;
CC organelle;
//
SN 46;
SD Pbr018921.1 ;
SQ MDTLYVERFSAPIEGFELGDGSNSVCCDENLAGGFKENHESTNPNSLPSNFDHPSVSSTSLSAGSDADNIDISDCNQPVLKYISDILLEEDLEGKACMLQQSLALKMAENSFHDALNSENPPLLNQPSFSVYQSFEDSDVGFHSSDGSVASFYSSNGSISANSGCVWDVSQPCHVQSSLFEPISDTLFVSDSFSVEEGIKFVPKQSCEIIDPERDQLMPSGSDQWPRGPCTLIGDLASKNGYNSTNGSKGKKNHRREDGYDTEEGRRNKQSAAACDSSDLQEIYDKVLQSVNHEPDSCSHDESSKTKGNRTLQHKEQSKGSKTSRAKKQNSNGKVVDLCKLLTECAEAVASYNQQAANELLKRIRQHSSPYGDSTQRLAHYFADGLEARLAGARNP…
CP Nuclear;
MF nucleic acid binding transcription factor activity;
MF DNA binding;
BP biosynthetic process;
BP cellular nitrogen compound metabolic process;
BP response to stress;
BP signal transduction;
BP cell differentiation;
BP anatomical structure development;
BP cell division;
BP symbiosis, encompassing mutualism through parasitism;
BP cell cycle;
BP homeostatic process;
CC intracellular;
CC cell;
CC nucleus;
CC cytoplasm;
CC organelle;
//
SN 47;
SD Pbr018922.1 ;
SQ MERFTVGHGSNQNLGNHGSTNPIFLPTNLDHNPSDSRSSQIPVNGFQVNHEPTNTLFLPPNPDHPSESGFSSSGSDGDTFDISVCNHPVLKYISDILLEEDLEGKPCMLQDCLALQAAEKSFYDVLNPKGRSSSQSPLPVDRSFENSDDDFTECCHSSIGCVAARTDSVSGSETSHVQSCPVESSSDAYNSTYRLKSKKNHLREDGDYTEEGRSNKQSAASADGPEPQEMFDEVLLYKDARHAFESCSDDQSVKTDGSGKLKCNKQPKVSKAARSKTKNKNRELVDLCTMLTQCAQAVASYDQRTASELIKKIRQHTSPCGEATERLAYYFANALEARLAGSRTPSYSPLLSPQTPATEILKAHQVYITSCPFTKMLYFFANRTIMKLAENATRLH…
CP Nuclear;
MF nucleic acid binding transcription factor activity;
MF DNA binding;
BP biosynthetic process;
BP cellular nitrogen compound metabolic process;
BP response to stress;
BP signal transduction;
BP cell differentiation;
BP anatomical structure development;
BP cell division;
BP cell cycle;
BP homeostatic process;
BP symbiosis, encompassing mutualism through parasitism;
CC intracellular;
CC cell;
CC nucleus;
CC cytoplasm;
CC organelle;
//
SN 48;
SD Pbr018923.1 ;
SQ MDTLFERFSSPMKNFQFGSTQFQVNHEPTNPLFLPTTPEHPTDSGFSNPGSDGDSFDMSDYNHSVIKYISDILLEEDLEDKPCMLQNCLALQAAEKSFYDVLNPKDPPSPDQPPHPVYQSFEHSDDDSSQSYSSNDSMAAKADSVFDSSETLLVSNSTSGNFGGVGEAGNLVPNLKHGIIDLQRYQLVPPGDNTLGRNSAPEPENDGYISANRLKGKKNHQREDGDYADGGRSNKQSAALGDDTEPQEMFDRVLLCHVNHTHASCIRDKPLSSEGSEKLQPKKQSKGSKTTRLKKQNNYQEVVDISTLLTQCAQATASYDQRSASEVLKQIRKHSSPSGDATERLAHYFADGLEARLVGARTPSYSPLLSIQTPAAEILKAHQMYVNYCPFKYMLH…
CP Nuclear;
MF nucleic acid binding transcription factor activity;
MF DNA binding;
BP biosynthetic process;
BP cellular nitrogen compound metabolic process;
BP response to stress;
BP signal transduction;
BP cell differentiation;
BP anatomical structure development;
BP cell division;
BP cell cycle;
BP homeostatic process;
BP symbiosis, encompassing mutualism through parasitism;
CC intracellular;
CC cell;
CC nucleus;
CC organelle;
CC cytoplasm;
//
SN 49;
SD Pbr018924.1 ;
SQ MDTFLDELPSPMKKFVFEQAPIPAYSNPNLVHEFEANHDFTDPSFFLVNPDPVSDSSSSPGVSSEVDSPDSGDTSNEILRYISQMLMEEEEYLENKPCMLHECLALQAAEKSLHDVLVQEQNPFSTDPLVDSVYRYVESPNQGSNHSSSGSVAAGNWVGSDWDWVQDVSKSSPAQIPNPLVSSGDGEIAHLEHNSSFVMAPRELLGKDVSFNSENGSRSKKNRQREDEDSVDDGRSNKLSAVYADEIELPELLDKVLLCEIDKQESNSCSPQESEKLQLNGKSRGSKGKKTRKKKPDDNAGMVDLWSMLTQCAQAVASYDRRNANELLQQIRLNSSPYGDGTQRLAHYLADGLELRLGSGVPSYNSLPNSQMSAADLLKAYQTYIRACPFHKMSNF…
CP Nuclear;
MF nucleic acid binding transcription factor activity;
MF DNA binding;
BP biosynthetic process;
BP cellular nitrogen compound metabolic process;
BP response to stress;
BP signal transduction;
BP cell differentiation;
BP anatomical structure development;
BP cell division;
BP cell cycle;
BP homeostatic process;
BP symbiosis, encompassing mutualism through parasitism;
CC intracellular;
CC cell;
CC nucleus;
CC organelle;
CC cytoplasm;
//
SN 50;
SD Pbr019422.1 ;
SQ MMQSEMFQTLWPYLNVTNSPLDTNEYTDQMGSSEFSSIFMASDEFSETSFPFSSMFSGEFEQVADCDHLLQVISTEVEEFPMELGGFEPNFFIDQYENMYPSCLEGSEGRNTLPSQQFSVEGNDVWSPNSFVTSETSFMDVTSVQQSITLPRDEMEIDNKVSIHHLLKAFGEAMEMGQRELGKVIMRCLAEKHRDYLKQESCKNFEAAFKLFYQIFPFGRFAHYAANTAILKAIPEDVETVHVVEFDIGEGVQLSQLIEAVAKRNKTLKVTAIKWDVDERDEVAPPQWRFEETKRQLQHHARSFGLNLKMEEITIEDLVSEIKKVNKRGGRREFIAFNTMVGLPHMRRSRSRGLVMEFLRLAKDLLNNSAGGIITFGDGDACVLRGNDSSFSSFFD…
CP Cytoplasmic;
CP Nuclear;
MF nucleic acid binding transcription factor activity;
MF DNA binding;
MF signal transducer activity;
BP biosynthetic process;
BP cellular nitrogen compound metabolic process;
BP cell differentiation;
BP anatomical structure development;
BP cell division;
BP anatomical structure formation involved in morphogenesis;
BP response to stress;
BP signal transduction;
CC intracellular;
CC cell;
CC nucleus;
CC cytoplasm;
CC organelle;
//
SN 51;
SD Pbr019423.1 ;
SQ MMQSEMNFQSLWPYLNVTNSLVDTNEYNDQMASTEFSSIFMASDEFSESSPFPFSTIFSVECEQFADCDNLLQVTSMAAEEFPMELGGFEPNFFIDQYENMYPSCLEGSEGSNTLPSQQFSVEGNDVWSPNSFVTSEASSMDVTSVQQSLTLPRDDMEIDNEVSIHHLLKAFSESMEMGQRELQLVIMRCLAEKVNPLGQSLERLAFNLCQGFVDNQHGDYLKQESCKNFEAAFNLFYQIFPFGRLAHYAANTAILEAIPEDVETVHVVEFDIGEGVQLSQLIEAVAKRNKTLKVTAIKWDVKESDEVAPPQWRFEETKKQLQHHARSFGLNLKVEEIAIEDLVSEIKKANKRGGMREFLAFNSMVGLPHMRRRRSRGLVMEFLRLAKDLLANSAR…
CP Cytoplasmic;
CP Nuclear;
MF nucleic acid binding transcription factor activity;
MF DNA binding;
MF signal transducer activity;
BP biosynthetic process;
BP cellular nitrogen compound metabolic process;
BP response to stress;
BP signal transduction;
BP cell differentiation;
BP anatomical structure development;
BP cell division;
BP anatomical structure formation involved in morphogenesis;
CC intracellular;
CC cell;
CC nucleus;
CC cytoplasm;
CC organelle;
//
SN 52;
SD Pbr021507.1 ;
SQ MQSGGYNGGRGSGVPDFYPNGRSISIAAAMNGHNPSQNNPFHRSQLPGLFLDPTASQIARQTQFQPQTQNPAAGLIGKRTLAEFQAQQQNHYNPHQNPSQNLYLRSLKARTFQHSSPISPLSPIDFSSGSSLSGSESSFSSTSILPHQRFGLPMLQQLRPQPINQPAPQAMSYVNNLVPNNPVQTRGVDSEKMFSNRLQELEKQLLDDNDEDDEGDAVSVITKTNSEWSETIQNLMGTAAPSQNQKPVSPSPTSSSSSSSSVASPATSTCSKQSLMEAATAISDGKSEAAMEILTRMNSTQVANPRPSSEQRLLEFMALALKSRVNPIDNPPPIAELFRQEHTGSTQSLYELSPCFRLGFMAANLAILEATMTDQSATSKVHVIDFDIGQGGQYVL…
CP Nuclear;
MF nucleic acid binding transcription factor activity;
MF DNA binding;
BP biosynthetic process;
BP cellular nitrogen compound metabolic process;
BP response to stress;
BP signal transduction;
BP cell differentiation;
BP anatomical structure development;
BP cell division;
BP cell cycle;
BP homeostatic process;
BP symbiosis, encompassing mutualism through parasitism;
CC intracellular;
CC cell;
CC nucleus;
CC cytoplasm;
CC organelle;
//
SN 53;
SD Pbr021861.1 ;
SQ MMINTLSGSMGSVKSENSCTSDLKPPSPTESTTMSMSISECKKTTTPPSSELDQQSSLTPPSLNFPTLKFEVDDVEVQSPDHSIWDSLFSEQFDTDFMVLSPVPNNMPNSPQNGGSATHQNYNYNYAQSMQGQSLSGCSPPRFSPHLGAFSSTHNPKGKGLSPLRRVFNSPVNQYMQPADQNMQSLPVSIEDFLDDYQRDGFIAAYPTTTSSRMSGSSSQSYNHHDHLPASSTVPSTTLDCMPMHNSSRFSRSESEESLVTAGNSQLTQESSRGSGYQQMGGAPLSQQLQQERMQEKQQQPLMQPHKHHQHQHQQNLHYNMMPPMAHEQEQDGGLQLVHLLLACAEAVAKKDYMLARRYLHHLNRVVMPLGDSMQRVASCFTEALSARLAATLTTT…
CP Nuclear;
MF nucleic acid binding transcription factor activity;
MF DNA binding;
BP response to stress;
BP signal transduction;
BP biosynthetic process;
BP cellular nitrogen compound metabolic process;
BP cell differentiation;
BP anatomical structure development;
BP cell division;
BP symbiosis, encompassing mutualism through parasitism;
BP cell cycle;
BP homeostatic process;
CC intracellular;
CC cell;
CC nucleus;
CC organelle;
CC cytoplasm;
//
SN 54;
SD Pbr022696.1 ;
SQ MANSFFSFTPFDFGVLGGGGGLTPQLEDYDKEDQELKGKPDHLFGIEELGLGEMEKLSHLSKDQQQSKASYLMLDNFSFHTGCSEHDLQRPSFKSEKARAHVSKDHDHRHYQQQNQHYQQPSKSNYSDWDNFTFDSAFPSTQPIQDATNELTYSQIGESDIAETNKQMPHQSSLAVLELLNNYGSAFKNLRGDRLSNRCNEAEASLFSIQQKLSTEEIMRVAGARYVQFSNQGYGDFFMPLHPFGYALSGLSEEETKDVELAHILLAAAEKVGYQQFERANRLLLRCEFAASFKVNPVQRVVFYFAEALRKRIEKETGNGMYKGNEISTYSNGLSTNLTFLAFYQDTPFHSVMQHPGIQVILENVALESNVHLIDLEIRSGVQWTGLMEVLAGREE…
CP Cytoplasmic;
MF nucleic acid binding transcription factor activity;
MF DNA binding;
BP response to stress;
BP signal transduction;
BP biosynthetic process;
BP cellular nitrogen compound metabolic process;
BP cell differentiation;
BP anatomical structure development;
BP cell division;
BP symbiosis, encompassing mutualism through parasitism;
BP cell cycle;
BP homeostatic process;
CC intracellular;
CC cell;
CC nucleus;
CC organelle;
CC cytoplasm;
//
SN 55;
SD Pbr022956.1 ;
SQ MAQEDGSPVTSSALQFFPWLSPGIGSPYSPWLRELKSEERGLCLIQLLYACASHVASGSIENANIWLDQTCQLASPDGDSMQRIAAYFTEALADRMLKGLPGLHKALNSTKISSVSEEILVQRLFFDLCPFLKVAYVVTNRAIVEAMEGEKMVHIIDLHSCEPAQWINLIQTLNARPEGPPHLRITGIHEQKEVLDQMFLRLTEEAENLNIPFQFNAIVSKLENLDIESLRVKTGEALAVCSILQLHSLLASDDDRRRKTPASKNLQKVLHMNKLTLGEWLEKDPINGSPDSALSPLSSASPKMGSFLTSLWGLSPKLMVITEQEANHNGHTLMDRIMEALYFYGALFDCLESTVSRSPMERQKVEKLLFGEEIKNIIACEGTERTERHEKLEKWI…
CP Cytoplasmic;
MF nucleic acid binding transcription factor activity;
MF DNA binding;
BP biosynthetic process;
BP cellular nitrogen compound metabolic process;
BP response to stress;
BP signal transduction;
BP cell differentiation;
BP anatomical structure development;
BP cell division;
BP symbiosis, encompassing mutualism through parasitism;
BP cell cycle;
BP homeostatic process;
CC intracellular;
CC cell;
CC nucleus;
CC organelle;
CC cytoplasm;
//
SN 56;
SD Pbr023110.1 ;
SQ MGSFNSSHIQQEEKEDHQNHPNNNNISDLQLYHHHHVSDQPSLIMSTSPDISQTHLRHLLITCAELISHLDFPSANRLISLLSSNSSPFGDSTERLTHYFVKALSYRLNINANYSPTTIGPMTALTTAASASASSSSNYLFPPMLLEEEDDNEETLHSCYLTLNQITPFIRFSHLTANQAILESIDSSHLSIHILDFDIMHGVQWPPLMQALVERSYNSPLHPPPTLRITATGRDLTLLLRTGERLFRFAQSLGLAFQFHPLVLNNAARPSDLISPSTLGLHQNEALAVNCVLYLHTLVTDDSRDLLLFLQKIKSLNPKVFTVANKEANHNNPLFFNRFVEALDHYGAVFESLEATLPPNSRERLAVEEWFGREVKDVVGVEGEKRKQRHERYETF…
CP Plasmamembrane;
MF nucleic acid binding transcription factor activity;
MF DNA binding;
BP biosynthetic process;
BP cellular nitrogen compound metabolic process;
BP anatomical structure development;
BP cell division;
BP response to stress;
BP signal transduction;
BP cell differentiation;
BP cell cycle;
BP homeostatic process;
CC intracellular;
CC cell;
CC nucleus;
CC organelle;
CC cytoplasm;
//
SN 57;
SD Pbr023527.1 ;
SQ MMQFTETPPPPLHEIITTPYSNNFPIMMNTNQTYRTRPWPGFPTSKFLGTNFGDANCMEQLLVHCANAIETNDATLAQQILWVLNNIAPQDGDSNQRLTCAFLRALIARAARIGNCKVLAAMANSQANFTIHTHKFSVVELASFIDLTPWHRFGFTTANAAILEAVEGYSVVHIVDLSLTHCMQIPTLVDAIARRHDGNVSPPLLKLTVAGTMEDVPPMLDLSYEELGSKLVNFARSRNIILEFRVIPSSYTDGFANLIQQLRVQNLVYAESSEALVVNCHMMLHYISEEALTLPAINPNPSSSGSTSSYGFDASSSSSSSLRTVFLKELRGLEPTIVVLVDEDVDLTSNNPVCRLRSAFNYLWIPYDTLDTFLPRGSKQRQWYEADVCWKIENVI…
CP Plasmamembrane;
MF nucleic acid binding transcription factor activity;
MF DNA binding;
BP biosynthetic process;
BP cellular nitrogen compound metabolic process;
BP cell cycle;
BP homeostatic process;
BP anatomical structure development;
BP cell division;
BP symbiosis, encompassing mutualism through parasitism;
BP response to stress;
BP signal transduction;
CC intracellular;
CC cell;
CC nucleus;
CC organelle;
CC cytoplasm;
//
SN 58;
SD Pbr024234.1 ;
SQ MDQHFRFRATGAGLSHTAPLPTVQSLPKRLLGTLKFDIKNSSNTPFSTDFDSDTLTTLSNSQEQHSSPENLSGATPSGTSSFETNSYVNRLSLSPSVDCSRDSLQVYSGRASSLTDANSSQNIKQTLQELESALMGPDDEEEVTTANTSSGESSRRQTQRSMSWIQEHQGSNPVQRQTSFVSRQRQLGEAQFEKRHKVIDEASLKGLPASNLKELLIACAGALSNNEVDSFEKLIEIARGAVSIGGEPIQRLGAYLVEGLVARKEASGANIYHALRCREPESNDLLSYMQILYEICPYLKFGYMAANGAIAEACRNEDRIHIIDFQIAQGTQWVTLLQALAARPSGAPHVRITGIDDPVSKHARGDGLEAVGRRLKAISDKFNIPVEFHGVPVFAP…
CP Nuclear;
MF nucleic acid binding transcription factor activity;
MF DNA binding;
BP biosynthetic process;
BP cellular nitrogen compound metabolic process;
BP response to stress;
BP signal transduction;
BP anatomical structure development;
BP cell division;
BP cell differentiation;
BP cell cycle;
BP homeostatic process;
BP symbiosis, encompassing mutualism through parasitism;
CC intracellular;
CC cell;
CC nucleus;
CC organelle;
CC cytoplasm;
//
SN 59;
SD Pbr024319.1 ;
SQ MDTLFRLVSLQSDHQQSFNNSTTSKTSTPTTTTTTSSSSRSSFLSNPPHPNYPHQNDDAGEECFNFFMDEEDFSSSSSKHYFPSNHPTPPTPNPLPTATTTPTPADFSFSPSLVNFELSNGKWAPEILLETARAIADKNSSRVQQLMWMLNELGSPYGDTDQKLASYFLQALFSRMTDSGDRCYRTLISASEKTCSFESTRKMVLKFQEVSPWTTFGHVACNGAIMEAFDGEPKLHIIDISNTYCTQWPTLLEALATRTDETPHLRLTTVVANRANDGSGGAAAQKVMKEIGARMEKFARLMGVPFKFNAIHHSGDLSELNLSELDIRDDEALAINCIGTLHSVQSVGNRRDYLVSAFRSLRPRIITLVEEEADLDVGVDGFDFVHGFQECLRWFR…
CP Plasmamembrane;
CP Nuclear;
MF nucleic acid binding transcription factor activity;
MF DNA binding;
BP cell cycle;
BP biosynthetic process;
BP cellular nitrogen compound metabolic process;
BP homeostatic process;
BP anatomical structure development;
BP cell division;
BP signal transduction;
BP response to stress;
BP cell differentiation;
BP symbiosis, encompassing mutualism through parasitism;
CC intracellular;
CC cell;
CC nucleus;
CC cytoplasm;
CC organelle;
//
SN 60;
SD Pbr024549.1 ;
SQ MKRDHRESCATVTARQNNSKPEYSSPPSSALNGKAKIWEDDQDGYSAGGDMDELLAVLGYKVRSDDMADVAEKLEQLEMVMGSAQEDGISQLSDTVHYNPSDLSGWVQSMLSELNTGDDMPSIDDPLLVPAQSSSITSMSFSNSQRSRVFSDDSEYDLRAIPGVAASPPAYSPSDTESTRKRLKASIGSDSNGSSSGAVSDPTRPRVLVDSQETGVRLVHTLMACAEAVQQENLKLADALVKHVGLLAASQTGAMRKVATYFAEALARRIYRIYPQDCLDSSYSDILEMHFYETCPYLKFAHFTANQAILEAFATARRVHVIDFGLKQGMQWPALMQALALRPGGPPAFRLTGIGPPQPDNTDALQQVGWKLAQLAETIGVEFEFRGFVANSLADL…
CP Cytoplasmic;
CP Nuclear;
MF nucleic acid binding transcription factor activity;
MF DNA binding;
BP signal transduction;
BP biosynthetic process;
BP cellular nitrogen compound metabolic process;
BP response to stress;
BP cell differentiation;
BP anatomical structure development;
BP cell division;
BP symbiosis, encompassing mutualism through parasitism;
BP cell cycle;
BP homeostatic process;
CC intracellular;
CC cell;
CC nucleus;
CC organelle;
CC cytoplasm;
//
SN 61;
SD Pbr026688.1 ;
SQ MADGIVNIIQSHQPWINYPNPNVNDFQNNPNSDPKPVENRFINLERSELSLWVEHITKQLIDDLPEPATAANTAANDTLQTSEDYFVPSSLSTDLNSPRKVPRRSYGEHELQLLADNNNVRARGGNDMSKLEEHGLTLITLLFECAVAISIDNLPEAHRMLLELTQLASPYGPSCAERVVAYFAKAMASRVINSWLGISSPLVNYKSVHDAFQVFNTISPFIKFAHFTSNQAILEAFHHHDRVHILDLDIMQGLQWPALFHILATRMEGPPHVRMTGMGTSSEILLETGKQLSSFARRLGLSFEFLPIVRKVGEVDASMVQVQRGETLAVHWLQHSLYDATGPDWKAMRFIEELAPRIITLVEQDMSHSGSFLDRFVGSLHYYSTMFDSLESYLPS…
CP Plasmamembrane;
CP Cytoplasmic;
MF nucleic acid binding transcription factor activity;
MF DNA binding;
BP biosynthetic process;
BP cellular nitrogen compound metabolic process;
BP anatomical structure development;
BP cell division;
BP response to stress;
BP signal transduction;
BP cell differentiation;
BP symbiosis, encompassing mutualism through parasitism;
BP cell cycle;
BP homeostatic process;
CC intracellular;
CC cell;
CC nucleus;
CC organelle;
CC cytoplasm;
//
SN 62;
SD Pbr027204.1 ;
SQ MGPNRNFLPKEYMINNERTNKRSVLDLITHSAASAMPCYPYPYTPFLEEGATVSILPYSDESGDHKRLKKNINISDSHNSLYSGGGSESSCITDISLSRSSSANSFKTLPRLHFRDHIWTYSQRYLAAEAVEEAATAMSNAKENRAEEDGTADGMRLVQLLIACAEAVACRDKSHASALLSELWANALVFGSSFQRVASCFVQGLANRLALVQPLGAVGFIGSAMSMKDFALDKKEEALRLVYEICPHIQFGHFVANSSILEAFEGEFFVHVVDLGMTLGLPHGDQWRGLIQSLATRTGQPPTRLRITGVGLCSDRLQIIGGELEAYAESLGINLEFSVVESNLENLRPEDIKMYDGEVLVVNSILQLHCVVKESRGALNSVLQMIHELSPKILVL…
CP Plasmamembrane;
CP Cytoplasmic;
CP Chloroplast;
MF nucleic acid binding transcription factor activity;
MF DNA binding;
BP response to stress;
BP signal transduction;
BP biosynthetic process;
BP cellular nitrogen compound metabolic process;
BP cell differentiation;
BP anatomical structure development;
BP cell division;
BP symbiosis, encompassing mutualism through parasitism;
BP cell cycle;
BP homeostatic process;
CC intracellular;
CC cell;
CC nucleus;
CC organelle;
CC cytoplasm;
//
SN 63;
SD Pbr027347.1 ;
SQ MDQHFGFGATGAGFSYTAPLPTVPSLRKRLLGSLKFDTSNSPNSPFLTHFDSDSLTTLSDSQEERSSSENLSGVTPSCTSSFETNSYVHQLRLSPSVDCSRDGLQVYSGSTSALKDANSNQNIKQTLQELESALMGPDDEEEAVSTPNTYIGESSRRQMQRSMSWIQEHQVSQAVQRQTSFVSRQRQLGEVQIEKRHKVIDDASLKGLPAGNLKQLLVACAGALSNNDMDGFEKLIEKARGAVSISGEPIQRLGAYLVEGLIARKEISGANIYHALRCREPESNELLSYMQILFEICPYLKFGYMAANGAIAEACRNEDRIHIIDFQIAQGSQWVTLLQALAARPGGAPHVRITGIDDPRSKHARGDGLEAVGRRLKAISDKFNIPVEFHGVPVFS…
CP Nuclear;
MF nucleic acid binding transcription factor activity;
MF DNA binding;
BP biosynthetic process;
BP cellular nitrogen compound metabolic process;
BP response to stress;
BP signal transduction;
BP cell differentiation;
BP anatomical structure development;
BP cell division;
BP cell cycle;
BP homeostatic process;
BP symbiosis, encompassing mutualism through parasitism;
CC intracellular;
CC cell;
CC nucleus;
CC organelle;
CC cytoplasm;
//
SN 64;
SD Pbr027642.1 ;
SQ MAPMFQDEGSSSATSSPLQCFSMISLSPSLGSPYPWLKELKSEDRGLYLIHLLLTCANHVATGSLENANVALEQISQLAAADGDTMQRIAAYFTEALADRILKAWPGLHRALNSTKISLVSDEILVRKVFFEMLPFLKVAFVLTNQAIMEAMEGEKMVHIIDLNAAEPVQWITLLQVLSARPEGPPHLRITGVHQRKEVLDQMAHRLTEEAEKLDIPFQFCPIISKLENLDMDKLRVKTGEALAISSVLQLHSLLASDDGLLKKKSPLASRGSNGNHLPRALQMSQGTLGELLEKEMGNGYSPSPDSTSSSPLSLTPSAKLDSFLNAFWGLTPKVMVITEQDSNHNGSTLMERLLESLYSYAALFDCLESTMSRTSLERLKVEKMLFGKEIKNIIA…
CP Cytoplasmic;
MF nucleic acid binding transcription factor activity;
MF DNA binding;
BP biosynthetic process;
BP cellular nitrogen compound metabolic process;
BP signal transduction;
BP response to stress;
BP cell differentiation;
BP anatomical structure development;
BP cell division;
BP cell cycle;
BP homeostatic process;
BP symbiosis, encompassing mutualism through parasitism;
CC intracellular;
CC cell;
CC nucleus;
CC organelle;
CC cytoplasm;
//
SN 65;
SD Pbr028236.1 ;
SQ MMQSEMNFQTLWPYLNVTNSALDTNEYTEQMGSSEFSSIFMASDEFSETSFPFSTTFSGEFEQLADCDNLLQVTSMAVEEFPMELGGFETNYLIGEIENMYASCLEGSEGSNTLPSQQFSGEGNDEWSPNSFAISEASSMDVTSVQQSITLPRDEMEIDNKVSIRHLLKAFGEAMEMGQRELEEVIMRCLVEKVNPLGQSLERLAFYLCQGVVDNQQGDYLKQESCKNFEAAFNLFYQIFPFGRFAHYAANTAILEAVPEDVETVHVVEFDIGEGVQLSQLIEAVAKRNKTLEVTAIKWDAEESDVVAPPQWRFEETKRQLQHHARSFGVNLKVEEIEIEDLVSEIKKANKRGGRREFLAFNSMVGLPHMRRRRRRGLLMEFLRLAKDLLANSARG…
CP Cytoplasmic;
CP Nuclear;
MF nucleic acid binding transcription factor activity;
MF signal transducer activity;
MF DNA binding;
BP biosynthetic process;
BP cellular nitrogen compound metabolic process;
BP cell differentiation;
BP anatomical structure development;
BP cell division;
BP response to stress;
BP signal transduction;
BP anatomical structure formation involved in morphogenesis;
CC intracellular;
CC cell;
CC nucleus;
CC cytoplasm;
CC organelle;
//
SN 66;
SD Pbr028237.1 ;
SQ MMQSEMKFQTFWPCLNETNSTLDTNEYTEQMGSSEFSSIFMPSDEFSETSGSFPFSTMFSGEFEQLADCDPLLQATWMAEEEFPLELGGFETNYLMGEIENMYASDCDQLPSPQFFVEGNGVWSPNSFVTSEASSMDVTSVQQSITLPRDEMEINNEVRIRHMLKAFGEAMEMGQRKLEEVIMRCLLEKVNPLGQPLEPLERLAFNLCQGVVDNQQGDYLKQESCKNYEAAFNLFYQIFPFGRFAHYAANTAILEAVPEDVETVHVVEFDIGEGVQLSQMIEAVAKRNKTLKVTAIKWDVEESDEVAPPHWRFEETKRQLQHHARSFGLNLKVEEIAIEDLVSLIKKANKRGGRREFLAFNSMVGLPHMRRRRSRGLLMEFLRLAKDLLANSARGI…
CP Cytoplasmic;
CP Nuclear;
MF nucleic acid binding transcription factor activity;
MF DNA binding;
MF signal transducer activity;
BP biosynthetic process;
BP cellular nitrogen compound metabolic process;
BP response to stress;
BP signal transduction;
BP cell differentiation;
BP anatomical structure development;
BP cell division;
BP anatomical structure formation involved in morphogenesis;
CC intracellular;
CC cell;
CC nucleus;
CC cytoplasm;
CC organelle;
//
SN 67;
SD Pbr028415.1 ;
SQ MFQDEGSSSAPSSPLQFFSTMSLSPSLGSPYPWLKELKSEERGLYLIHLLLTCANHVATGSLENANAALEQISQLASADGDTMQRIAAYFTEALADRILKAWPGLHTALNSTKISLVSEEILVRKVFFEMLPFLKVAVVLTNQAIMEAMEGEKMVHIIDLNAAEPAQWIALLQVLSARPEGPPHLRITGVHQQKDVLDQMAHRLTEVAEKLDIPFQFCPIVSKLENLDMDKLRVKTGEALAVSSVLQLHSLLASDDELLKRKSPLASKGSNGNHLPRALQMSQGTLGELLEKEMGNRYSPSPDSTSSSPLSLTPSAKLDSFLNAFWDLTPKVMVITEQDSNHNGSTLMERLLEALYSYATLFDCLESTMPRTSLERLKVEKMLFGEEIKNIIACEG…
CP Cytoplasmic;
MF nucleic acid binding transcription factor activity;
MF DNA binding;
BP biosynthetic process;
BP cellular nitrogen compound metabolic process;
BP signal transduction;
BP response to stress;
BP anatomical structure development;
BP cell division;
BP cell cycle;
BP homeostatic process;
BP cell differentiation;
BP symbiosis, encompassing mutualism through parasitism;
CC intracellular;
CC cell;
CC nucleus;
CC organelle;
CC cytoplasm;
//
SN 68;
SD Pbr028512.1 ;
SQ MNNTTTNSNSSSVEQQPPKMVRKRMASEIEVQTTLTSRTAGSDYFRLSRRGIINNSPPVQPVSQNPNASKVNSSMFYPNHSTMLLPVPSSTNLAALTSPGGAFLSPTSPSPSPSSAAAAGTWGPIDPLSFHRPPPVQPTTTTQTTTTPAVCGFSGLPLFPPEKTTPLNTSITATTPSSVSMEDGSSAATAWIDGIIKDLVHSSTNVSIPQLIHNVREIIFPCNPSLAALLEYRLRSISEPLPPPPLPLPVPSFNPTPIPDMRRRQQGGPGPGALKLNLDSGAIHDVAIFNPSTVENNDLYLQSWSGGAGGGGVGLSLPQPNPTAAPITCNQTNPHHQSPSFNQAIHQTQDKQLENSSSSSPAAESTTPTAAPAPTTTAATAPPEPTTSAVSLLREK…
CP Plasmamembrane;
CP Nuclear;
MF nucleic acid binding transcription factor activity;
MF DNA binding;
BP biosynthetic process;
BP cellular nitrogen compound metabolic process;
BP anatomical structure development;
BP cell division;
BP signal transduction;
BP response to stress;
BP cell differentiation;
BP symbiosis, encompassing mutualism through parasitism;
BP cell cycle;
BP homeostatic process;
CC intracellular;
CC cell;
CC nucleus;
CC organelle;
CC cytoplasm;
//
SN 69;
SD Pbr029392.1 ;
SQ MFQDEGSSSAPSSPLQFFSTMSLSPSLGSPYPWLKELKSEERGLYLIHLLLTCANHVAAGSLENANAALEQISQLASADGDTMQRIAAYFTEALADRILKAWPGLHTALNSTKISLVSEEILVRKVFFEMLPFLKVAVVLTNQAIMEAMEGEKMVHIIDLSAAEPAQWIALLQVLSARPEGPPHLRITGVHQQKDVLDQMAHRLTEVAEKLDIPFQFCPIVSKLENLDMDKLRVKTGEALAISSVLQLHSLLASDDELLKRKSPLASKGSNGNRLPRALQMSQGTLGELLEKEMGNRYSPSPDSTSSSPLSLTPSAKLDSFLNAFWDLTPKVMVITEQDSNHNGSTLMERLLEALYSYAALFDCLESTMPRTSLERLKVEKMLFGEEIKNIVACEG…
CP Cytoplasmic;
MF nucleic acid binding transcription factor activity;
MF DNA binding;
BP biosynthetic process;
BP cellular nitrogen compound metabolic process;
BP signal transduction;
BP response to stress;
BP anatomical structure development;
BP cell division;
BP cell cycle;
BP homeostatic process;
BP cell differentiation;
BP symbiosis, encompassing mutualism through parasitism;
CC intracellular;
CC cell;
CC nucleus;
CC organelle;
CC cytoplasm;
//
SN 70;
SD Pbr029703.1 ;
SQ MRVPVSSPHSNNNNQSPKHSTQTNNQSVNFHLGISSLGGYEPTSVLDLRHSPSPVSAEKPSKILAISDVLSHSNHDPVEWEEQVDWDSIMRDLGLHDDNVPNLKNSIPQLNSNDPQISEYLHPQPFDPSQLVHSDFNINLSEVYSSQNCYDHVINDFHQSGSWNVGVDFIEELIGAADRFDSDELPLAQVILDRLNNRLRSSSPSKPVGKPLQRAAALLEALNGSAFFHVIDFDIGLGGQYASLMKELAEKADVASRNKGNQVPPVLRITAVVPEEYAVETQLIRENLSQFAQELKIRFQVEFVPVRTFEMMSFKAVKFMDGEKTAVLLSPYILRRLCSQNNISGFLGDMRRVSPSVVVFVDGEGMGDSGTTSFRRNFVSGLEFFSIMLESLDASV…
CP Cytoplasmic;
CP Chloroplast;
CP Nuclear;
MF nucleic acid binding transcription factor activity;
MF DNA binding;
MF signal transducer activity;
BP biosynthetic process;
BP cell differentiation;
BP cellular nitrogen compound metabolic process;
BP anatomical structure development;
BP cell division;
BP signal transduction;
BP response to stress;
BP anatomical structure formation involved in morphogenesis;
CC intracellular;
CC cell;
CC nucleus;
CC organelle;
CC cytoplasm;
//
SN 71;
SD Pbr029793.1 ;
SQ MRESHKHIIPNVPRQIGEQPVEEPESSFQNVEQQASSDEVVQGTQLSVQRFEQHCTLESSSGTSGYPGRSSSSSLNFSANGSPASHPDVHSYHSCGSPVNQSCISNETDDLGHKIRELENALLGNDSDAFDAYNIIDEVGANQIYSEAENWEQMMMMIRGSDLKEVLCACAKALANNDMSTTEQLFSSLRQMVSVSGEPIQRLGAYILEGLIARLASSGSSICASLRCKEPASAELLSYMHILYEVCPYFKFGYMSANGAIAEAMKDESRVHIIDFQVAQGSQWITLIQALATRPGGPPQIRITGIDDSTSAYVRGGGLGVVGQRLSRLAESCKVPFEFHAAGIFGSEVQLEDLVIRPGEAIAVNFALMLHHIPDESVNSHNHRDRLLRLAKSLSP…
CP Plasmamembrane;
CP Nuclear;
MF nucleic acid binding transcription factor activity;
MF DNA binding;
BP biosynthetic process;
BP cellular nitrogen compound metabolic process;
BP response to stress;
BP signal transduction;
BP cell differentiation;
BP anatomical structure development;
BP cell division;
BP cell cycle;
BP homeostatic process;
BP symbiosis, encompassing mutualism through parasitism;
CC intracellular;
CC cell;
CC nucleus;
CC organelle;
CC cytoplasm;
//
SN 72;
SD Pbr029798.1 ;
SQ MRESHKHIIPNVPRQIGEQPVEEPESSFQNVEQQASSDEVVQGTQLSVQRFEQHCTLESSSGTSGYPGRSSSSSLNFSANGSPASHPDVHSYHSCGSPVNQSCISNETDDLGHKIRELENALLGNDSDAFDAYNIIDEVGANQIYSEAENWEQMMMMIRGSDLKEVLCACAKALANNDMSTTEQLFSSLRQMVSVSGEPIQRLGAYILEGLIARLASSGSSICASLRCKEPASAELLSYMHILYEVCPYFKFGYMSANGAIAEAMKDESRVHIIDFQVAQGSQWITLIQALATRPGGPPQIRITGIDDSTSAYVRGGGLGVVGQRLSRLAESCKVPFEFHAAGIFGSEVQLEDLVIRPGEAIAVNFALMLHHIPDESVNSHNHRDRLLRLAKSLSP…
CP Plasmamembrane;
CP Nuclear;
MF nucleic acid binding transcription factor activity;
MF DNA binding;
BP biosynthetic process;
BP cellular nitrogen compound metabolic process;
BP response to stress;
BP signal transduction;
BP cell differentiation;
BP anatomical structure development;
BP cell division;
BP cell cycle;
BP homeostatic process;
BP symbiosis, encompassing mutualism through parasitism;
CC intracellular;
CC cell;
CC nucleus;
CC organelle;
CC cytoplasm;
//
SN 73;
SD Pbr030739.1 ;
SQ MLAGCSSSTLLSPRHRLRSEATAQLQACSFQLPSMSTQRLDLPCSFPRKDTSRSQPIRPVGLSVEKSIDSKAGSCSLKQSIRLPPLATTGPVSVTAAFVEAGKENRNQFWREKKIGKRFAEPVDDDESCRNRAKRKRGCGDNGGGLGLGQLGGGNFWFQPGIQLPPRTTQLPFSLTCSGDDERVCYVPGEAISQPLPLSNSPWLDSIVTEITDLGKKDGGGEDSRGLVREASAASSTSSESQSLALRVNESASEHEAGNGTRNPYVPYGGAGVVAEEEEDADDESEAEHLGFELVSLLTACVEAIGLKNIAAINHFIAKLGELASPKGSAISRLSAYYTEALSLRVTRLWPHVFQINAPREFDRRDEDSGIAVRLLNQVSAIPKFVHFTSNEILLR…
CP Cytoplasmic;
CP Chloroplast;
CP Nuclear;
MF nucleic acid binding transcription factor activity;
MF DNA binding;
BP biosynthetic process;
BP cellular nitrogen compound metabolic process;
BP response to stress;
BP signal transduction;
BP cell differentiation;
BP anatomical structure development;
BP cell division;
BP symbiosis, encompassing mutualism through parasitism;
BP cell cycle;
BP homeostatic process;
CC intracellular;
CC cell;
CC nucleus;
CC organelle;
CC cytoplasm;
//
SN 74;
SD Pbr032385.1 ;
SQ MEEKTEIYHEPAALEAAELSFYELLGEKHSLSPPCDMTSYADQNNESRDECHPSHSSDYNTTSWIGFGVVIRVSTNPCMFLLSPILCHSMPHQMEVNGTIKNVQQHGQSNEASGRKGRGKKWGCKKEVVDLRTLLTLCARAVAANGKRTHNELLKHIRQHSSLMAMGNPLQRLAHYFADGLEARMAGSGAQIYKDLVSKPASAADVLKAYYLYLVVCRLRGYRFCSQTRQ;
CP Nuclear;
MF nucleic acid binding transcription factor activity;
MF signal transducer activity;
BP biosynthetic process;
BP cellular nitrogen compound metabolic process;
CC intracellular;
CC cell;
CC nucleus;
CC cytoplasm;
CC cytosol;
CC organelle;
//
SN 75;
SD Pbr032804.1 ;
SQ MDISLFSPNKEANFLQQYSNQIKINGLAAAIDMQSTNQQPQNSHTSTSRSWGSSEPCPEGAKWASRLLMECARAVSEKDSSKINHLLWMLNELASPYGDCEQKLAFYFLQALFCKATESGVRCYKTLTSVAEKSHSFDSARKLILKFQEVSPWTTFGHVASNGAILEALEGETKLHIIDISNTICTQWPTLLEALATRNDETPHLKLTVVVTASIVKSVMKEIGQRMEKFARLMGVPFEINVISGLNNLGELTKEDLGVQEDEAVAVNCIGALRRVEVEERGAVIRMFQSLRPRVVTVVEEEADLFSSSVNHDFVKCFEECLRFYTLYFDMLEESFVPTSNERLMLERECSRSIVRVLGCDHHDHDDDKNGGECERRERGSQWSDRLKVAFSPVRF…
CP Cytoplasmic;
MF nucleic acid binding transcription factor activity;
MF DNA binding;
BP cell cycle;
BP biosynthetic process;
BP cellular nitrogen compound metabolic process;
BP homeostatic process;
BP anatomical structure development;
BP cell division;
BP response to stress;
BP signal transduction;
BP cell differentiation;
BP symbiosis, encompassing mutualism through parasitism;
CC intracellular;
CC cell;
CC nucleus;
CC cytoplasm;
CC organelle;
//
SN 76;
SD Pbr033333.1 ;
SQ MKTEVRGSITSVSLQNPSTALFTTSQGKSLTGALTGCLGSLDGACIEKLLLHCASALESNDVTLAQQVMWVLNNVASSVGDPNQRLTSWILRALISRASKVFPTPMNFNGSSSTSTIPSRLMSVTELAGYVDLIPWHRFGYCASNSAICKAIEGCPKVHILDFSITHCMQWPTLIDALEKRAEGPPLLRITVPHWRPQVPPLLNVSSEEVGLRLGNFSRFRNVPFEFNVIENSSSLELLLGTQLNPSSLGLREDEVLVVNCQNWLRYLSDEPLGGIPGHQDGSMRNTFLNTIRSLNPRIIVVVDEDSDLTAPSLSSRITTCFNYLWIPFDSLETFLPKDSTQRMNYESDVGHKIENIIGFEGQQRIERLESGVTMSQRLRNIGFSSAPFCEETAKE…
CP Plasmamembrane;
MF nucleic acid binding transcription factor activity;
MF DNA binding;
BP biosynthetic process;
BP cellular nitrogen compound metabolic process;
BP cell cycle;
BP homeostatic process;
BP anatomical structure development;
BP cell division;
BP response to stress;
BP signal transduction;
BP cell differentiation;
BP symbiosis, encompassing mutualism through parasitism;
CC intracellular;
CC cell;
CC nucleus;
CC organelle;
CC cytoplasm;
//
SN 77;
SD Pbr033535.1 ;
SQ MDPRRRGSSDSFNGVQLGNQPLPILSHPTVVAGSRFDSNTFFDNSYRNFSCPQPGLSANSVSSYSSVSPEDDSAEDCDFSDEVLKYINQMLMEEDMEDKTCMLKESLELQAAEKSFYEVLGKKYPPSPELFHRYASQYGEIPAESSSGTWSNYITSSCNSGGYFGDTTSIQSPDGYSSQLQGLQSYRISQSFNGYELVDSPNSSIYSPDWNTESQSVWQFNKGVEEASRFLPGETNLVVELEANEMSVHTPKVGAAASYVKVERTDEGEYSSGGSRGKKNLYREDEDVEEKRSSKQAAFSSESPLRSEMFDVVLLCSTGEGQERLESLREALQNGMSKSVIQNGQSEVSKGGKGRGKKQSVKKEVVDLRTLLISCAQAGGADDHRTANELLKKVRQ…
CP Chloroplast;
CP Nuclear;
MF nucleic acid binding transcription factor activity;
MF DNA binding;
BP biosynthetic process;
BP cellular nitrogen compound metabolic process;
BP anatomical structure development;
BP cell division;
BP response to stress;
BP signal transduction;
BP cell differentiation;
BP cell cycle;
BP homeostatic process;
BP symbiosis, encompassing mutualism through parasitism;
CC intracellular;
CC cell;
CC nucleus;
CC organelle;
CC cytoplasm;
//
SN 78;
SD Pbr033601.1 ;
SQ MEGFNAWLFFTLHESLNHDLSIRRFCLARLEQEQGGGRGGGEGAEQERILLPRLTNLSTASSTWIIAFALVIMTFNPWRNNKVVVVVVVLSIEYSDQDGIETFSMVDDLYGVVLIMMEAEDDHVDTSGLVDDFPVSKTKMRPRVEHEIRNIVTFEGSNRIERHERADQWIGRAGFQETGLKCTSQARMMMISVYGCDGYTTATEKDCLLLGWKGRPIMLASAWQARSVSSS;
CP Plasmamembrane;
MF nucleic acid binding transcription factor activity;
MF DNA binding;
MF signal transducer activity;
BP response to stress;
BP signal transduction;
BP biosynthetic process;
BP cellular nitrogen compound metabolic process;
BP anatomical structure development;
BP transport;
BP cell division;
CC intracellular;
CC cell;
CC nucleus;
CC organelle;
CC cytoplasm;
CC cytosol;
//
SN 79;
SD Pbr034525.1 ;
SQ MWAALSPPLFSIPEEAQALRHPPQHCLPPTAAEPAVAAAXXXXXXXXXXXXXXXXXXXSGAGGGCGRSTDTTTAGVENPSRTPLEEQKCGPPLGMEDWESVLSESPGQEQSILRLIMSDIEDPSLGLNTLLQSSSGSDHLHQDLEFSGGGFQDVVDQGGYGGGFEPNNNSGSLVSPSLHASSGPDFNFSNNASNVETRSSNVRPNHAIFSASMSNPFLVSQSSGMFQQQQSMGLDEKPQIFNPQMVINQNQAQFAQHPAMFMPLTYAQLQEHHLLSPPPSKRLNSGELGPSYPVQRVPFSNPGQELVVRAQQQLQFLPQHLQQQRPTMPVAKEKMMSPAEGCKEMMNQNQLQQQQFQQAVIDQLFNAAELIETGNSVLAQGILARLNHQLSPIGKP…
CP Cytoplasmic;
CP Nuclear;
MF nucleic acid binding transcription factor activity;
MF DNA binding;
BP biosynthetic process;
BP cell differentiation;
BP cellular nitrogen compound metabolic process;
BP anatomical structure development;
BP cell division;
BP response to stress;
BP signal transduction;
CC intracellular;
CC cell;
CC nucleus;
CC organelle;
CC cytoplasm;
//
SN 80;
SD Pbr035217.1 ;
SQ MPFQFQQGKAVVEITTASLPAIFTDSSCSKYKDGGFFNHHHHSFPTGEPNSVLHMRRSPSPPTSASTLSSSFNKGGGGGDKSTSLAAETLPAVGPASSKDEWACELQSIRSGGLEAVTGSGGGVERCGLGLGGLEDWETMLSETAASPAHDQSLLRWIAGDVDDMSCGLKQLLQSGNGNHHNSPIDFDGNAGLGIVDQGPNFDLIGSSGVSVPNFGFAGSGFSNGGNNGSNGKVGFVPHRSGSFGLLNYKVSNVGLMYNNGGTNSVNCNIQNPIFSNSSNTVALPVSLPAVYGQQQFESSPDEKPQILNPQLFMSNQTQQPQNPSFFMPLAYAQQEQYHLLQSQPKRHNSGSNVNLSTHQIQKGQFSDPRHDIFVRHQQQQQLGFAQGMQFLPQQH…
CP Cytoplasmic;
CP Nuclear;
MF nucleic acid binding transcription factor activity;
MF DNA binding;
BP biosynthetic process;
BP cell differentiation;
BP cellular nitrogen compound metabolic process;
BP anatomical structure development;
BP cell division;
BP response to stress;
BP signal transduction;
BP symbiosis, encompassing mutualism through parasitism;
BP cell cycle;
BP homeostatic process;
CC intracellular;
CC cell;
CC nucleus;
CC organelle;
CC cytoplasm;
//
SN 81;
SD Pbr035386.1 ;
SQ MPFQFQQGKGVIEIATASLPAIFTDSSCSKYKDGGFFNHHHHSFPTSEPNSVLHMRRSPSPPTSASTLSSSFNNGGGGGDKSTPLAAETPPAVGPTSSKDEWACELQSIPSGGLEAVTGSAGGVQRCGLGLGGLEDWETMLSETAASPGHDQSLLRWIAGDVDDTSFGLKQLLQSGNNHHHHHNSPLDFDGNAGLGVVDQGPNFDLIGNGGVSDPNFGFGGSGFGNGSNKGSNGKLGFVPPGSGSFGLLNYKVSNVESMHNNGGSNSVNCNIQNPIFSNSSNTLALPVSLPAVYGQQQLSPDEKPQILNPQLFMSNQNQQPQVAQNPNFFMPLAYAQQEQHHLLQSQPKRHNSGTNIDPSTHQIQKGQFSDPGQEFFMRKQQQQQFGFAQGMQFLP…
CP Cytoplasmic;
CP Nuclear;
MF nucleic acid binding transcription factor activity;
MF DNA binding;
BP biosynthetic process;
BP cell differentiation;
BP cellular nitrogen compound metabolic process;
BP anatomical structure development;
BP cell division;
BP response to stress;
BP signal transduction;
BP symbiosis, encompassing mutualism through parasitism;
BP cell cycle;
BP homeostatic process;
CC intracellular;
CC cell;
CC nucleus;
CC organelle;
CC cytoplasm;
//
SN 82;
SD Pbr035399.1 ;
SQ MHNNGGSNSVNCNIQNPIFSNSSNTLALPVSLPAVYGQQQLSPDEKPQILNPQLFMSNQNQQPQVAQNPNFFMPLAYAQQEQHHLLQSQPKRHNSGTNIDPSTHQIQKGQFSDPGQEFFMRKQQQQQFGFAQGMQFLPQQHRIQQKPLMVPKQKVVLGNGEEMAHHQQQQQLQHTLLDQLYKAAELVGTGNFSHAQGILARLNHQLSPVGKPLQRAAFYFKEALQLLLLMNNPATSPPPRTPTPFDIIFKMGAYKVFSEVSPLLQFVNFTCNQALLEALSDTDQIHIVDFDIGFGAHWASFMQELPIRNRGASAPSLRITAFTSPSTHHPVELRLMRDNLTQFANEIGISFDLEVVNIDSLDQNSYSLPIFRANNNEAVAVNFPIWSTSNQPAALP…
CP Nuclear;
MF nucleic acid binding transcription factor activity;
MF DNA binding;
BP biosynthetic process;
BP cell differentiation;
BP cellular nitrogen compound metabolic process;
BP anatomical structure development;
BP cell division;
BP response to stress;
BP signal transduction;
BP symbiosis, encompassing mutualism through parasitism;
BP cell cycle;
BP homeostatic process;
CC intracellular;
CC cell;
CC nucleus;
CC organelle;
CC cytoplasm;
//
SN 83;
SD Pbr036939.1 ;
SQ MAPSRNFLPEEYMINHERTNKMSVLDLSTHSAASAMTCYPYLHTPLLEEGGTPSTPPYSDESGNHKRLKWTTSISDSMSSHNSLYSGGGSGDSCITDISLSRRSSTNSLNTLPRLHFRDHIWTYTQRYLAAEAVEEAVTVMSNAEGNGKEEDGTADGMRLVQLLTACAEAVACRDKSHASALLYELRANALVFGSSFQRVASCFVQGLANRLALVQPLGAVRFIGSATSTKDFALDKKEEALRLVYEICPHIQFGHFVANSSILEAFEGESFVHVVDLGMTLGLPHGDQWRGLIESLATRTGQPPTRLRITGVGLYGDRLQIIGEELEAYADSLGINLEFSVVESNLENLRPEDIKMYDGEVLVVNSILQLHCVVKESRGALNSVLQMLHELSPKI…
CP Cytoplasmic;
CP Chloroplast;
MF nucleic acid binding transcription factor activity;
MF DNA binding;
BP response to stress;
BP signal transduction;
BP biosynthetic process;
BP cellular nitrogen compound metabolic process;
BP cell differentiation;
BP anatomical structure development;
BP cell division;
BP symbiosis, encompassing mutualism through parasitism;
BP cell cycle;
BP homeostatic process;
CC intracellular;
CC cell;
CC nucleus;
CC organelle;
CC cytoplasm;
//
SN 84;
SD Pbr037013.1 ;
SQ MTQLLLSSAMAIAIDGHDLDLDLSGCTTTTTSTNTVSTDHWYDWSPVVDWDALEPTDHLAGEDFHGLIESMMEDQDGSTELNLSSAQNEHLELEASNDTTSSAEMMTLTDEDGSANGEDSKGLRLVHLLMAAAEALTGANKSRDLARVILFRLKELVSPTDGSNMERLAAYFTEALQGLLEGAGGLHGKHLIGIGAHHDHGHHPTDDVIAAFQLLQDMSPYVKFGHFTANQAILEAVAHDRRVHVVDYDIMEGIQWASLMQALVSRKEGPPTPHLRITALSRGGSGRRSIGTVQETGRRLTAFAASIGQPFSFHQCRLDSDETFRPSALKLVKGEALVINCMLNLPHFNYRSQDSIASFLSGSKTLNPRLVTLVEEEVRPAGDGGFVARFMDSLYH…
CP Cytoplasmic;
MF nucleic acid binding transcription factor activity;
MF DNA binding;
BP biosynthetic process;
BP cellular nitrogen compound metabolic process;
BP symbiosis, encompassing mutualism through parasitism;
BP cell division;
BP anatomical structure development;
BP response to stress;
BP signal transduction;
BP cell differentiation;
BP cell cycle;
BP homeostatic process;
CC intracellular;
CC cell;
CC nucleus;
CC cytoplasm;
CC organelle;
//
SN 85;
SD Pbr037186.1 ;
SQ MMINTLSGSMGSVKSENSFTSDLKPPSPTESTTMSMSISECKKTTTPPSSELDQQSSLTPPSLNFPTLKFEVDDVEVQSPDHSIWDSLFSEQFDTDFMVLSPVPNNMPNSPQNGGSATHQNYNYNYAQSMQGQSLSGCSPPRFSPHLGAFSSTHNPKGKGLSPLRRVFNSPVNQYMQPADQNMQSLPVSIEDFLDDYQRDGFIAAYPTTTSSRMSGSSSQSYNHHDHLPASSTVPSATLDCMPMHNSSRFSRSESEASLVTAGNSQLTQESSRGSGYQQMGGAPLSQQLQQERMQEKQQHPLMQPHKHHQHQQNLHYNMMPPMAHEQEQDGGLQLVHLLLACAEAVAKEDYMLARRYLHHLNRVVMPLGDSMQRVASCFTEALSARLAATLTTTPS…
CP Nuclear;
MF nucleic acid binding transcription factor activity;
MF DNA binding;
BP response to stress;
BP signal transduction;
BP biosynthetic process;
BP cellular nitrogen compound metabolic process;
BP cell differentiation;
BP anatomical structure development;
BP cell division;
BP symbiosis, encompassing mutualism through parasitism;
BP cell cycle;
BP homeostatic process;
CC intracellular;
CC cell;
CC nucleus;
CC organelle;
CC cytoplasm;
//
SN 86;
SD Pbr037212.1 ;
SQ MLAGCSSSTLLSPRHRLRSEAAAQLQACSFQLPSMSTQRLDLPCSFPRKDTSRSQPIRPVGLSVEKSIDSKAGGCSLKQSIRLPPLATSGPVTATAAFVETGKENHDQFWGEKKRGKRFAEPVDDDESFRKRAKRKRGSGDNGGDGEGGGGLSLGQLGGGNFWFQPGFHLPPTTQPPFSLTCSGDEERVCYVPAEEISQPLPLSNNPWLDSIVTEITDLGKKDGGGEASRGLVGEGSAGSSTSSESQSLALRVNESASEHDTGNGTRNPYVPHGGAGVVAEEEEDDESEAEHLGFELVSLLTACVEAIGLKNIAAINHFIAKLGELASPKGSAISRLSAYYTEALSLRVTRLWPHVFQINAPRKFDRRDEDSGIELRLLNQVSPIPKFVHFTSNEI…
CP Cytoplasmic;
CP Nuclear;
MF nucleic acid binding transcription factor activity;
MF DNA binding;
BP biosynthetic process;
BP cellular nitrogen compound metabolic process;
BP anatomical structure development;
BP cell division;
BP response to stress;
BP signal transduction;
BP cell differentiation;
BP symbiosis, encompassing mutualism through parasitism;
BP cell cycle;
BP homeostatic process;
CC intracellular;
CC cell;
CC nucleus;
CC organelle;
CC cytoplasm;
//
SN 87;
SD Pbr037662.1 ;
SQ MEDVPPMLDLSYEELGSKLVNFARSRNIILEFRVIPSSYTDGFANLIQQLRVQNLVYAESSEALVVNCHMMLHYISEEALTLPAINPNPSSGGSTSSYGFDASSSSSSSLRTVFLKELRGLEPTIVVLVDEDVDLTSNNPVCRLRSAFNYLWIPYDTLDTFLPRGSKQRQWYEADVCWKIENVIAYEGFQRVERLEPKCRWVQRMRNANFRSVSFGEDAVLEVKTMLDEHATGWGLKREEEDVVLTWKGHNVVFATAWMPA;
CP Cytoplasmic;
CP Chloroplast;
MF nucleic acid binding transcription factor activity;
MF DNA binding;
MF signal transducer activity;
BP biosynthetic process;
BP cellular nitrogen compound metabolic process;
BP response to stress;
BP signal transduction;
BP anatomical structure development;
BP cell cycle;
BP homeostatic process;
BP cell division;
CC intracellular;
CC cell;
CC nucleus;
CC organelle;
CC cytoplasm;
//
SN 88;
SD Pbr037663.1 ;
SQ MMQFTETPPPPLHEIITTPYSNNLPIMMNKNQTHRTRPWPGFPTSKSLGTNFGDANCMKQLLVHCVNAIETNNSTVAQQILCVLNNIAPQEGDSNRRLTCAFLRALIARAARIGSYKSSPPWPIPKPTSPSTLTSSPSLIDLTSWHRFGFAAANAAILEAVQGYYVVHIVDLSLTHCMQIPTLVDAIAKRHDGNVSPPLLKLTVAGTMEDVPPMLDLSYEELGSKLVNFARSRNIILEFRVIPSSYIDGFANLIQ;
CP Plasmamembrane;
CP Nuclear;
MF nucleic acid binding transcription factor activity;
MF DNA binding;
MF signal transducer activity;
BP biosynthetic process;
BP cellular nitrogen compound metabolic process;
BP cell cycle;
BP homeostatic process;
BP anatomical structure development;
BP cell division;
BP signal transduction;
BP response to stress;
BP transport;
BP symbiosis, encompassing mutualism through parasitism;
CC intracellular;
CC cell;
CC nucleus;
CC organelle;
CC cytoplasm;
//
SN 89;
SD Pbr037666.1 ;
SQ MMQFTETPPPPLHEIITTPYSNNLPIMMNKNQTHRTRPWPGFPTSKSLGTNFGDANCMKQLLVHCVNAIETNNSTVAQQILCVLNNIAPQEGDSNRRLTCAFLRALIARAARIGSYKSSPPWPIPKPTSPSTLTSSPSLIDLTSWHRFGFAAANAAILEAVQGYYVVHIVDLSLTHCMQIPTLVDAIAKRHDGNVSPPLLKLTVAGTMEDVPPMLDLSYEELGSKLVNFARSRNIILEFRVIPSSYIDGFANLIQ;
CP Plasmamembrane;
CP Nuclear;
MF nucleic acid binding transcription factor activity;
MF DNA binding;
MF signal transducer activity;
BP biosynthetic process;
BP cellular nitrogen compound metabolic process;
BP cell cycle;
BP homeostatic process;
BP anatomical structure development;
BP cell division;
BP signal transduction;
BP response to stress;
BP transport;
BP symbiosis, encompassing mutualism through parasitism;
CC intracellular;
CC cell;
CC nucleus;
CC organelle;
CC cytoplasm;
//
SN 90;
SD Pbr038494.1 ;
SQ MKTSQQHRGVASIHHKLYHPPVQQIDAYGYQILENSVFPDTGSQGNNVSFQTCKDGEEQFFTLESSPATAFVTCDSPSAVSSLSNKSPFSPQGSHSCLSDQHHSSGNNYGSPTSGCSVVEDDNEFKYRLREVEVSLLGPDSDIVDSHFCCHKSGMARWSQSQIATMIPKLNLKDVLLYCAHAISEDDLYTATSWMEVLGQMVSVSGEPMQRLGAYMLEGLRAKLERSGSLIYKALKCEVPTSSQLMSYMSVLYDICPYWKFAYVSANVVIREALENEPIIHIIDFQIAQGSQWVPLIQDLARRPGGPPCIRITGVDDTQSAHARGGGLHIVGERLSKLAASCNVPFEFNAAARCGSQVELHNLRIQPGEAIAVNFPYVLHHMPDESVSTENHRDRL…
CP Nuclear;
MF nucleic acid binding transcription factor activity;
MF DNA binding;
BP biosynthetic process;
BP cellular nitrogen compound metabolic process;
BP response to stress;
BP signal transduction;
BP cell differentiation;
BP anatomical structure development;
BP cell division;
BP cell cycle;
BP homeostatic process;
BP symbiosis, encompassing mutualism through parasitism;
CC intracellular;
CC cell;
CC nucleus;
CC cytoplasm;
CC organelle;
//
SN 91;
SD Pbr038995.1 ;
SQ MDPRRRGSSDSFNGVQLGNQPLPILSHPTVVAGSRFDSNTFLDNSYRNFSCPQPGLSANSVSSYSSVSPEDDSAEDCDFSDVVLKYINQMLMEEDMEDKTCMLKESLELQAAEKSFYEVLGKKYPPSPELFHRYASQYGEIPAESSSGTWSNYITSSCNSGGYFGDTTSIQSPDGYSSQLQGLPSYRISQSFNGYGLVDSPNSSIYSPDWNTESQSVWQFNKGVEEASRFLPGETNLVVELEANEMSVQTPKIGAAASYVKVERTDEGEYSSGGSRGKKNLYREDEDVEEKRSSKQAAFSSESPLRSEMFDVVLLCSTGEGQERLESLREALQNGMSKSVIQNGQSEVSKGGKGRGKKQSVKKEVVDLRTLLISWAQAVAADDHRTANELLKKVRQ…
CP Chloroplast;
[truncated: 195 more rows]

## Sheet: Percentage of all functions 
GRAS gene family
Biological processes		Cellular components		Molecular functions		Subcellar localization
response to stress:10.48%;		intracellular:19.96%;		nucleic acid binding transcription factor activity:48.25%;		Extracellular:1;
signal transduction:10.48%;		cell:19.96%;		DNA binding:48.25%;		Plasmamembrane:14;
biosynthetic process:10.48%;		nucleus:19.96%;		signal transducer activity:3.51%;		Cytoplasmic:20;
cellular nitrogen compound metabolic process:10.48%;		organelle:19.96%;				Chloroplast:1;
cell differentiation:9.75%;		cytoplasm:19.96%;				Nuclear:52
anatomical structure development:10.48%;		cytosol:0.18%;
cell division:10.48%;
symbiosis, encompassing mutualism through parasitism:8.60%;
cell cycle:8.82%;
homeostatic process:8.82%;
anatomical structure formation involved in morphogenesis:0.79%;
transport:0.36%;
