# Supplementary material for: Integrative Analysis of the GRAS Genes From Chinese White Pear (Pyrus bretschneideri): A Critical Role in Leaf Regeneration
Source: Front Plant Sci. 2022 Jun 6;13:898786. doi: 10.3389/fpls.2022.898786 (PMC9208361; doi:10.3389/fpls.2022.898786)
Supplement: Supplementary Table S5 — Promoter analysis of GRAS gene family in Pyrus bretschenedri. [file Table_5.XLSX]

## Sheet: Number of cis-elements
Table S5 Promoter analysis of GRAS gene family in Pyrus bretschenedri
Gene I.d	Gene Name	CGTCA-motif	LTR	GARE-motif	ABRE	TC-rich repeats	TCA-element	P-box	TGA-element	MBS	Box 4	ARE	TGACG	TGACG-motif	G-Box	O2-site
Pbr024319.1	PbGARS71		3		2				2	1		2		3	1
Pbr018647.1	PbGRAS1	3			5				2			1		3	1
Pbr024234.1	PbGRAS10	4			1				1	2				4		2
Pbr027642.1	PbGRAS11	2	3				2	1		1		3		2
Pbr023110.1	PbGRAS12	2	1		4	1	1			2		2		2	2	1
Pbr003875.1	PbGRAS13	2		1						1		3		2
Pbr003874.1	PbGRAS14	2		1							1	4		2
Pbr003873.1	PbGRAS15	2	2					2	2	4	1	3				2
Pbr003871.1	PbGRAS16	4	3	1	3			1	1	1	1	3	4		2
Pbr003870.1	PbGRAS17	4			3		3	1			1	2		4	1
Pbr003869.1	PbGRAS18	1	1				1			1		1		1
Pbr003868.1	PbGRAS19	4			1	1	1	1		2	1	1		4
Pbr017150.1	PbGRAS2	1			1					1		1		1		2
Pbr003867.1	PbGRAS20	3	2	2	1	1	1	2		1		1		3
Pbr019422.1	PbGRAS21	2		1				1				1		2
Pbr019423.1	PbGRAS22	2	1	2				1		1				2		1
Pbr009003.1	PbGRAS23	2	4		2			2		2	1	2		2
Pbr032804.1	PbGRAS24										2	1				1
Pbr010041.1	PbGRAS25	2	1						1			1		2
Pbr027347.1	PbGRAS26	3	1		1				1	2		1		3		1
Pbr026688.1	PbGRAS27	1			2				1	3	1			1	1	1
Pbr000044.1	PbGRAS28	1	3	1	5	2						1		1	1	1
Pbr027204.1	PbGRAS29		2		2					1
Pbr022956.1	PbGRAS3	2	1				1	1				1		2	1
Pbr028415.1	PbGRAS30	3	3	1			3			1		4		3
Pbr030739.1	PbGRAS31	3	2							1		3		3
Pbr009709.1	PbGRAS32	1	1			1	1	1		1	2	1		1
Pbr018479.1	PbGRAS33	2		1			1		1	1		3		2
Pbr016671.1	PbGRAS36	2	1		7				1	1		1		2	2	2
Pbr029703.1	PbGRAS37	3	2		7				2		1			3	2	3
Pbr005254.1	PbGRAS38	1	2							1		1		1		1
Pbr018056.1	PbGRAS39			1	1		1	1				2			1	1
Pbr001048.1	PbGRAS4	3	3		3				2	1		2		3	1	1
Pbr017879.1	PbGRAS40	3			5									3		3
Pbr041554.1	PbGRAS41	6		1	6					2				6	3	1
Pbr038494.1	PbGRAS42	2	1	1	3	2								2
Pbr033601.1	PbGRAS43	1			1							1		1		1
Pbr011071.1	PbGRAS44	2							2	2	1			2		1
Pbr039366.2	PbGRAS45	4	1							1		1		4		2
Pbr018237.1	PbGRAS46		1				1					1			1
Pbr041202.1	PbGRAS47	2			3	2	1			1		4		2	1
Pbr029392.1	PbGRAS48	3	3	1			3			1		4		3
Pbr017325.1	PbGRAS49	3			2					1		1		3	1	1
Pbr005472.1	PbGRAS5	4	3		4	1			4	1		1		4	1
Pbr018916.1	PbGRAS50			1					1	3	1	4		5
Pbr018917.1	PbGRAS51		3		1			2		1		5				2
Pbr018918.1	PbGRAS52		1		2			2		3	1	4
Pbr018920.1	PbGRAS53		3	1	2					2	1	4			2
Pbr018921.1	PbGRAS54	1	2	3	2		2	1			1	3		1	1
Pbr018922.1	PbGRAS55		2		1				1			1
Pbr018923.1	PbGRAS56		1		2		1	2		1	1	1
Pbr018924.1	PbGRAS57	3	2	1	1	1				1		1		3
Pbr028512.1	PbGRAS58	6			5				1	2	1	2		6	1	1
Pbr028236.1	PbGRAS59		2		1			1				1		2	2
Pbr014064.1	PbGRAS6	9	1		14							1		9	3	1
Pbr028237.1	PbGRAS60	2	1					2		1				2
Pbr010864.1	PbGRAS61	5			3				1	1		1		5	1
Pbr011960.1	PbGRAS62			1		1				1
Pbr011959.1	PbGRAS63	2	4		3	1		1	1	4		2		2	2	1
Pbr034525.1	PbGRAS64	2		1			1			1		4		2
Pbr018291.1	PbGRAS65	3			4	1	1			5		1		3	1
Pbr036939.1	PbGRAS66	3	2		1					1		1
Pbr014306.1	PbGRAS68	6	3	1	4	1			2			1		6	2
Pbr017263.1	PbGRAS69	4			9				4	1		1		5	2	1
Pbr022696.1	PbGRAS7	3	2	1	1	2	1					3		3
Pbr023527.1	PbGRAS70	4	2		1		1		2	2		3		4	1	2
Pbr037013.1	PbGRAS72	4	1		2		1		1	1		2		4	1
Pbr033333.1	PbGRAS73			1	1		1	1				2			1	1
Pbr012085.1	PbGRAS74	1	1		5				1			2		1	2
Pbr013644.1	PbGRAS75	6			3					1				6	1	3
Pbr024549.1	PbGRAS76	5	2		8					3				5	2	2
Pbr007753.1	PbGRAS77			1	3		1	2				2			2
Pbr021861.1	PbGRAS78	4	1	1	7	1	1			1		1		4	3	1
Pbr003262.1	PbGRAS79				1		2					3
Pbr040573.1	PbGRAS8	4			1				1	2				4		2
Pbr004512.1	PbGRAS80	2	2		6				1	1		3		2	2	1
Pbr004607.1	PbGRAS81		3	1	4		1	3	1			5			1	1
Pbr005109.1	PbGRAS82	2		1			1			1		4		2
Pbr010433.1	PbGRAS83										1	2
Pbr021507.1	PbGRAS84	3			4				2			1		3	1
Pbr029793.1	PbGRAS85	2			1					2	1	1		2		2
Pbr029798.1	PbGRAS86	2			1					2	1	1		2		2
Pbr033535.1	PbGRAS87	1	2		2			3	1	1		2		1	1	2
Pbr035217.1	PbGRAS88	2	4		2			2		2	1	2		2
Pbr035386.1	PbGRAS89	1			3			2	1	2		1		1
Pbr041406.1	PbGRAS9	2			2				2					2		2
Pbr035399.1	PbGRAS90	1	1					2		1		1		1
Pbr037186.1	PbGRAS91	4	1	1	7	1	1			2		1		4	3
Pbr037212.1	PbGRAS92	4	2					1	1	2		3		4
Pbr037662.1	PbGRAS93	1	1		1		1			1		2		1	1	1
Pbr037663.1	PbGRAS94	4								1		2		4		1
Pbr037666.1	PbGRAS95	4							1	1		2		4		1
Pbr038995.1	PbGRAS96	2	2		2			3	1	1		2		2	1	2
Pbr041150.1	PbGRAS97	1			2					1				1	1
Pbr041223.1	PbGRAS98	4	1	1	7	1	1			1		1		4	3	1
Pbr032385.1	PbrGRAS34	4						1		1		2		2
Pbr016067.1	PbrGRAS35	6		1	2			1	1	1		2		2		2
Pbr016997.1	PbrGRAS67								1	1		2		1
Pbr042464.1	PbrGRAS99	3	1	1	7	1	1			1		2	4	2	1
	total	229	107	34	216	22	40	47	52	106	23	165	8	225	68	64

## Sheet: Percentage 
cis-elements	CGTCA-motif	LTR	GARE-motif	ABRE	TC-rich repeats	TCA-element	P-box	TGA-element	MBS	Box 4	ARE	TGACG	TGACG-motif	G-Box	O2-site
Total	229	107	34	216	22	40	47	52	106	23	165	8	225	68	64	1406
	0.162873	0.0761024	0.0241821	0.153627	0.0156472	0.0284495	0.0334282	0.0369844	0.0753912	0.0163585	0.117354	0.0056899	0.160028	0.0483642	0.0455192

## Sheet: Functions of cis-elements
cis-elements	Functions
CGTCA-motif	cis-acting regulatory element involved in the MeJA-responsiveness
LTR	cis-acting element involved in low-temperature responsiveness
GARE-motif	gibberellin-responsive element
ABRE	cis-acting element involved in the abscisic acid responsiveness
TC-rich repeats	cis-acting element involved in defense and stress responsiveness
TCA-element	cis-acting element involved in salicylic acid responsiveness
P-box	gibberellin-responsive element
TGA-element	auxin-responsive element
MBS	MYB binding site involved in drought-inducibility
Box 4	part of a conserved DNA module involved in light responsiveness
ARE	cis-acting regulatory element essential for the anaerobic induction
TGACG	cis-acting regulatory element involved in the MeJA-responsiveness
TGACG-motif	cis-acting regulatory element involved in the MeJA-responsiveness
G-Box	cis-acting regulatory element involved in light responsiveness
O2-site	cis-acting regulatory element involved in zein metabolism regulation
