# Supplementary material for: Integrative Analysis of the GRAS Genes From Chinese White Pear (Pyrus bretschneideri): A Critical Role in Leaf Regeneration
Source: Front Plant Sci. 2022 Jun 6;13:898786. doi: 10.3389/fpls.2022.898786 (PMC9208361; doi:10.3389/fpls.2022.898786)
Supplement: Supplementary Table S6 — Primer sequences used in this study. [file Table_6.XLSX]

## Sheet: Sheet1
Table.S6 Primer sequences used in this study
Primer for qRT-PCR
Gene name	Forward primer	Reverse primer
β- Actin	AAGCTCTCCTTTGTTGCTGTT	GACTTCTGGGCATCTGAATCT
PbGRAS1	GACTTCTCATCTGGGTCATCACTT	GGCTCACTACGTTGAATTCCAGAC
PbGRAS2	TGATCATTCTGGGGTTTTGGTTAG	AAAGAAGCCCATTGCCCGCCATAA
PbGRAS21	TGATCATCTCCTGCAAGTCATATC	TTGGCCTCCGTCAACATTTCCCCG
PbGRAS22	CAATCCTTGTGGCCCTACCTGAAT	TTCCACATTCTCTTTCTTCGTTCC
PbGRAS33	GAGTTTGGTGAGCCCCTCTCTACA	GGGCTTGGATTATTTGGTGGGGAA
PbGRAS35	TGCGCGGAAGCCGTCCAGCTGAAC	ACATCAAGACCCTCATCCGCAGCC
PbGRAS37	CACAACTCCGGCTCGAATGTAAAC	TCGCATCAAGTGACTCCAAAAGGT
PbGRAS5	CCAACAACAACCACCACACTCTCA	ATGAAGAAACTGTGAAGAGAGGAA
PbGRAS59	AAGGCAGTGAGGGAAGCAATACGC	TTTCACACAAGCATCTCCGTCACC
PbGRAS59	CATCGACTTTGATATCGGCCTGGG	GCTCCATTGCCCTCATTCCCGCTC
PbGRAS60	GTCCAACAATCAATAACCCTGCCG	CAGGTTTCAACTCTGATCAAGGGA
PbGRAS61	AGACTTCTCATCTGGGTCAGCAAT	GTGAGAGTGCGGCTTATCCAAC
PbGRAS64	TTGTCCATTTTGCCAATTTTACTT	GCTGCAGCTGGTTCTGGTTCATCA
PbGRAS68	CAACAACACCCACCACACTCTCGC	CGATTGTTCGGGCCCGACCAAACC
PbGRAS69	ACGTCCCAAATCTCAAGACTTCAA	CCAGGGCCCTATCGTGCCAGCAAA
PbGRAS82	GTTTCACTCGAGAAAACCTTTCCA	TGAAGGTGCTGTGGAAGAAACTGA
PbGRAS84	AGACTTCTCATCTGGGTCATCACT	GTGAGAGTGCGGCTTATCCA
PbGRAS88	ACTTCGGCTTCCACTCTCTCTTCG	CTCCAAGCTGAAGCGGAGATGAGC
PbGRAS89	ATTACAAGGTTTCAAATGTTGAGT	TAGAACAAGTGACTCTTGACGCTT
PbGRAS90	CAGGCACAAATATAGACCCGAGTA	ATGAGCTCTCGACGCTGCCAG
PbGRAS99	GGAGGAAGCTTTGGAGTCATTCTC	TTCTACCTCCGTTTGGGCTTCTGT
Primer for gene cloning and vector construction
Gene name	Forward primer	Reverse primer
PbGRAS99	ATGGGAGAAGACCTTTTTTG	CTATGGAGTTTGCCTTTGCT
PbGRAS89	ATGCCCTTTCAGTTCCAGCAGG	TCAGCACCTCCAAGCTGAAG
pCAMBIA1305-PbGRAS99	Xba I-CTAGTCTAGAATGGGAGAAGACCTTTTTTG	BamHI-CGCGGATCCTGGAGTTTGCCTTTGCT
pCAMBIA1305-PbGRAS89	Xba I- CTAGTCTAGAATGCCCTTTCAGTTCCAGCAGG	BamHI-CGCGGATCCGCACCTCCAAGCTGAAG
pCAMBIA1301-PbGRAS99	BamHl-CGCGGATCC ATGGGAGAAGACCTTTTTTG	Sall-ACGCGTCGACTCA CTATGGAGTTTGCCTTTGCT
pCAMBIA1301-PbGRAS89	BamHl-CGCGGATCC ATGCCCTTTCAGTTCCAGCAGG	Sall-ACGCGTCGACTCA GCACCTCCAAGCTGAAG
